# Supplementary material for: Suberin plasticity to developmental and exogenous cues is regulated by a set of MYB transcription factors
Source: PubMed Central journal article supplement — Proc Natl Acad Sci U S A. 2021 Sep 22;118(39):e2101730118. doi: 10.1073/pnas.2101730118 (PMC8488582; doi:10.1073/pnas.2101730118), 2021-09-22
Supplement: pnas.2101730118.sapp.pdf [file pnas.2101730118.sapp.pdf]

## Supplementary Information for

### **Suberin plasticity to developmental and exogenous cues is regulated by a set of MYB transcription factors**

Vinay Shukla<sup>1</sup>, Jian-Pu Han<sup>1</sup>, Fabienne Cléard<sup>1</sup>, Linnka Lefebvre-Legendre<sup>1</sup>, Kay Gully<sup>2</sup>, Paulina Flis<sup>3</sup>, Alice Berhin<sup>2,‡</sup>, Tonni Grube Andersen<sup>2,§</sup>, David E Salt<sup>3</sup>, Christiane Nawrath<sup>2</sup>, Marie Barberon<sup>1\*</sup>

<sup>1</sup> Department of Botany and Plant Biology, University of Geneva, 30 Quai Ernest Ansermet, Geneva, Switzerland

<sup>2</sup> Department of Molecular Plant Biology, University of Lausanne, Unil-Sorge, Lausanne, Switzerland

<sup>3</sup> Future Food Beacon of Excellence and School of Biosciences, University of Nottingham, United Kingdom

<sup>‡</sup> Current address: UCLouvain, Louvain Institute of Biomolecular Science and Technology, Université Catholique de Louvain, Louvain-la-Neuve, Belgium

<sup>§</sup> Current address: MPI for Plant Breeding Research, Carl-von-Linné-weg 10, 50829, Köln, Germany

\* Correspondence should be addressed to [marie.barberon@unige.ch](mailto:marie.barberon@unige.ch)

This PDF file includes:

SI text  
Figures S1 to S5  
Tables S1 to S4  
SI References

## Supplementary Information Text

### Supplementary material and methods

#### Gene numbers

The corresponding gene numbers are as follow: *CASP1*, At2g36100; *CASP3*, At2g27370; *ESB1*, At2g28670; *SGN3*, At4g20140; *CDEF1*, At4g30140; *ELTP*, At2g48140; *ABII*, At4g26080; *GPAT5*, At3g11430; *SYP122*, At3g52400, *MYB41*, At4g28110; *MYB53*, At5g65230; *MYB92*, At5g10280; *MYB93*, At1g34670.

#### Constructs

Plasmids were constructed using Multisite Gateway cloning (Thermo Fisher Scientific). The list of primers used for cloning are presented in Table S1. *MYB* promoter sequences upstream of ATG - *MYB41* (2167bp), *MYB53* (4117bp), *MYB92* (4098bp), *MYB93* (2873bp) were amplified from Col-0 genomic DNA and cloned into *pDONRP4-PIR* (Thermo Fisher Scientific). For promoter-reporter expression clones, *PROMOTER::NLS-3xmVenus* or *PROMOTER::NLS-3xmScarlet*, the entry plasmids containing the promoter region, along with *pDONRL1-NLS-3xmVenus-L2* (1) or *pDONRL1-NLS-3xmScarlet-L2* and the pEN-R2-*tNOS*-L3 containing the terminator *tNOS* (2) were recombined into the destination vectors pFR7m34GW or pFG7m34GW. The destination vectors pFR7m34GW or pFG7m34GW were obtained by substitution of the Hygromycin sequence in pH7m34GW by the FastRed and FastGreen sequences respectively (3). For endodermal specific expression of MYBs using *CASP1* and *ELTP* promoters (4, 5), MYB coding sequences were amplified from wild-type Arabidopsis cDNA and cloned into pDONR221\_L1-ORF-L2 vector were recombined with pDONR-P3-*tNOS*-P2R in the destination plasmid pFR7m34GW. Except for *MYB41cDNA* that was obtained from (6) and recombined into pDONR221\_L1-CDDDB-CAM-L2. For endodermal specific estradiol inducible *MYB41* expression (*CASP1xve::MYB41-mVenus*), the entry vectors containing the inducible *CASP1* promoter pEN-L4-CASP1xve-R1 (7) was recombined with pDONR221\_L1-MYB41nostop-L2 and pEN-R2-mVenus +stop-L3 into the destination vector pFG7m34GW. Cloning of vectors for CRISPR/Cas9 was done as previously described in (8-10). sgRNA for spCas9 were designed using webtools – CRISPR-P 2.0 design tool (<http://crispr.hzau.edu.cn/CRISPR2/>) (11) and Benchling (<https://www.benchling.com>). Pairs of annealed oligos of the sgRNA were cloned into the Bbs-I linearized entry vector (8) and recombined into the destination vector containing Cas9 expression cassette and a FastRed or FastGreen selection marker cassette. For large deletion of genomic regions in *myb41\_c1* or multiplex targeting of *MYB53*, *MYB92* and *MYB93*, multiple entry vectors were used to clone different sgRNAs. Thereafter, recombined into the destination vector containing Cas9 expression cassette and FastRed or FastGreen selection marker cassette. After fluorescent seed selection in T1, non-fluorescent seeds in the T2 generation (indicating a segregation of the vector backbone containing the Cas9 cassette) were used to

identify the mutations. Primary screening of mutants was done using High-Resolution Melting (HRM) curve analysis as previously described in (9). Candidates from HRM analysis were further confirmed for the mutations by sequencing of PCR-amplified genomic regions. Absence of off-target effects were controlled by sequencing the closest *MYB* homologues in the final mutant. To test the loss of function for *myb41\_c2*, *myb53\_c1*, *myb92\_c1* and *myb93\_c1*, the corresponding cDNA were cloned from the mutated plants into pDONR221 and recombined with pEN-L4-CASP1-R1 and pDONR-P3-*tNOS*-P2R in the destination plasmid pFRm34GW. All constructs were transformed into *Agrobacterium* strain GV3101 by electroporation and used for transformation of *Arabidopsis* plants by the floral-dip method (12).

### **Growth conditions**

Seedlings for staining and live-imagine were grown vertically on square plates containing half-strength MS with 0.8% agar (Duchefa), without sucrose. Seeds were surface sterilized before sowing on plates and were incubated 2 to 4 days at 4°C and put to grow in growth chambers under continuous light (~100  $\mu$ E) at 22 °C. All histological and live-microscopy analysis were performed on 5-day old seedlings. For other experiments the age of the plant is specified in the figure legends. In soil, for amplifications and experiments in pots, plants were grown in long-day conditions (16 h day, 8 h night) with light intensity of 150-180  $\mu$ E with 60-70% humidity and at  $20 \pm 2$  °C.

### **Image analysis**

For suberin pattern quantifications, tiled images covering the whole seedlings in single images were captured with an epifluorescence stereomicroscope- ZEISS Axio Zoom.V16. For imaging of large field of view at high-resolution, multiple small images were captured as tiles and stitched. Region of interest of the root was defined by marking the ‘tile-region’ after a quick scan of the sample at lower resolution. Adequate number of focus points were used to adjust the focus of the sample along the region of interest. 10% area of overlap was defined for alignment and stitching of tiles. Fiji (<http://fiji.sc/Fiji>) (13) was used on Zen2.3 blue exported stitched tile images for quantification of suberin patterns (in mm) along the root: suberized for the fully suberized zone, patchy for the partially suberized zone and non-suberized –for the zone prior to suberization. Results are presented as percentage of the root as previously done (14, 15).

For analysis of promoter reporter lines, imaging of large field of view at high-resolution, were captured as tiles and stitched together for a larger view of roots. Region of interest of the root was defined by marking the ‘tile-region’ after a quick scan of the sample at lower resolution. Adequate number of focus points were used to adjust the focus of the sample along the region of interest. Acquisition of tiled images was combined with Z-stacking and in certain cases with time series as well. 10% area of overlap

was defined for alignment and stitching of tiles and tiled Z-stacks were used for orthogonal projection and subsequently exported. For time-course experiments, 25-30 min time interval in between the scans was defined for 10-12 cycles. Scanner and detector settings were kept unchanged for every experiment. Images were analyzed with Zen2.3 blue (LSM 800) or Zen2.3 black (LSM 780) software and Fiji (<http://fiji.sc/Fiji>) (13). Fluorescence intensities were calculated nucleus by nucleus along one cell file from the onset of nuclear signal, considering the maximum intensity detected in each individual nucleus as an estimate the difference of intensity between nuclei.

### **Lignin staining**

ClearSee-adapted cell wall staining was performed as described (16). Briefly, 5-day-old seedlings were fixed in  $1 \times$  PBS containing 4% paraformaldehyde, 1 h at room temperature and washed twice with  $1 \times$  PBS. Following fixation, the seedlings were cleared overnight in ClearSee solution after which the solution was exchanged to 0.2% Basic Fuchsin in ClearSee solution lignin staining. After overnight staining, the dye solution was removed and rinsed once with ClearSee solution, the seedlings were subsequently washed in ClearSee solution for 30 min and washed again in another ClearSee solution for at least one overnight before observation with a Leica SP8 confocal. All clearing, staining and washing steps were performed in 12 well plates, covered with aluminum foil and under gentle agitation.

### **Propidium iodide test**

Propidium iodide (PI) was used as an apoplastic tracer to assess Casparian strip functionality as previously described (7, 17). Seedlings were live-stained with 15  $\mu$ M PI; kept in the dark for 10 min and then rinsed twice with water. The apoplastic barrier was determined under a fluorescent Leica DM6 B microscope with I3 filter and 20x magnification, as the number of endodermal cells after the onset of elongation where PI uptake is blocked at the endodermis. The onset of elongation was defined as the first endodermal cell for which the length was at least three times its width.

### **Chemical suberin analysis**

5-day-old roots were shaved off after flash freezing and extracted in isopropanol/0.01% butylated hydroxytoluene (BHT). They were then delipidized two times (16h, 8h) in each of the following solvents, i.e., chloroform-methanol (2:1), chloroform-methanol (1:1), methanol each with 0.01% BHT, under agitation before being dried for 3 days under vacuum. Depolymerization was performed by base catalysis (18). Briefly, dried plant samples were trans-esterified in 2 mL of reaction medium. 20 mL reaction medium was composed of 3 mL methyl acetate, 5 mL of 25% sodium methoxide in dry methanol and 12 mL dry methanol. The equivalents of 5 mg of methyl heptadecanoate and 10 mg of  $\omega$ -pentadeca-lactone/sample were added as internal standards. After incubation of the samples at 60°C for 2h 3.5 mL dichloromethane, 0.7 mL glacial acetic acid and 1 mL 0.9% NaCl (w/v) /100 mM Tris-HCl (pH 8.0) were added to each sample and subsequently vortexed for 20 s. After centrifugation (1500g for

2 min), the organic phase was collected, washed with 2 mL of 0.9% NaCl, and dried over sodium sulfate. The organic phase was then recovered and concentrated under a stream of nitrogen. The resulting suberin monomer fraction was derivatized with BFTSA/pyridine (1:1) at 70°C for 1 h and injected out of hexane on a HP-5MS column (J&W Scientific) in a gas chromatograph coupled to a mass spectrometer and a flame ionization detector (Agilent 6890N GC Network systems). The temperature cycle of the oven was the following: 2 min at 50°C, increment of 20°C/min to 160°C, of 2°C/min to 250°C and 10°C/min to 310°C, held for 15 min. 3 independent experiments were performed with 4 replicates for each genotype, respectively, and a representative dataset is presented. The amounts of unsubstituted C16 and C18 fatty acids were not evaluated because of their omnipresence in the plant and in the environment.

### **Ionic analysis**

Dried leaves were transferred into the Pyrex test tubes, weighted, and digested with 1 ml of concentrated trace metal grade nitric acid Primar Plus (Fisher Chemicals) containing an indium internal standard, in the dry block heaters (SCP Science; QMX Laboratories) at 115°C for 4 h. After cooling, digested samples were diluted to 10mL with 18.2 MΩcm Milli-Q Direct water (Merck Millipore) and elemental analysis was performed using an ICP-MS (PerkinElmer NexION 2000 equipped with Elemental Scientific Inc autosampler) in the collision mode (He). A matrix-matched liquid reference material composed of pooled digested samples was prepared before the beginning of the sample run and used every ninth sample to correct for variation within ICP-MS analysis runs. The calibration standards were prepared from single element standards solutions (Inorganic Ventures; Essex Scientific Laboratory Supplies Ltd, Essex, UK). Samples concentrations were calculated using external calibration method within the instrument software. The final concentrations were obtained by normalizing the element concentrations to the sample dry weight.

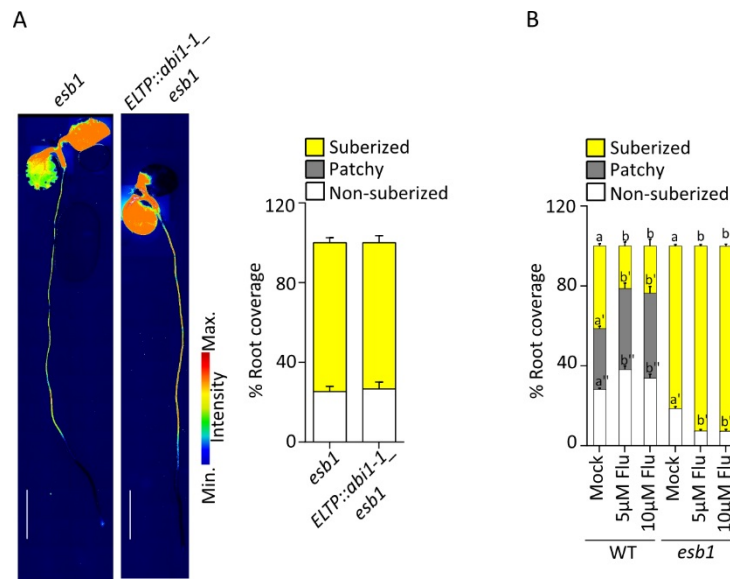

**Figure S1. Enhanced suberin phenotypes in CS mutants are ABA-independent.** (A) Fluorol Yellow (FY) staining for suberin in *esb1* and *ELTP::abi1-1\_esb1* plants. Whole-mount staining in full seedlings (*Left panels*) and quantifications of suberin pattern along the root (*Right panel*),  $n \geq 10$ , error bars, standard deviation. No significant difference observed between genotypes. Scale bars, 2 mm. (B) FY staining in WT and *esb1* plants in mock conditions or treated with 5 or 10  $\mu\text{M}$  Fluridone (Flu.) for 16 h. Different letters indicate significant differences between conditions for a given genotype ( $P < 0.05$ ).

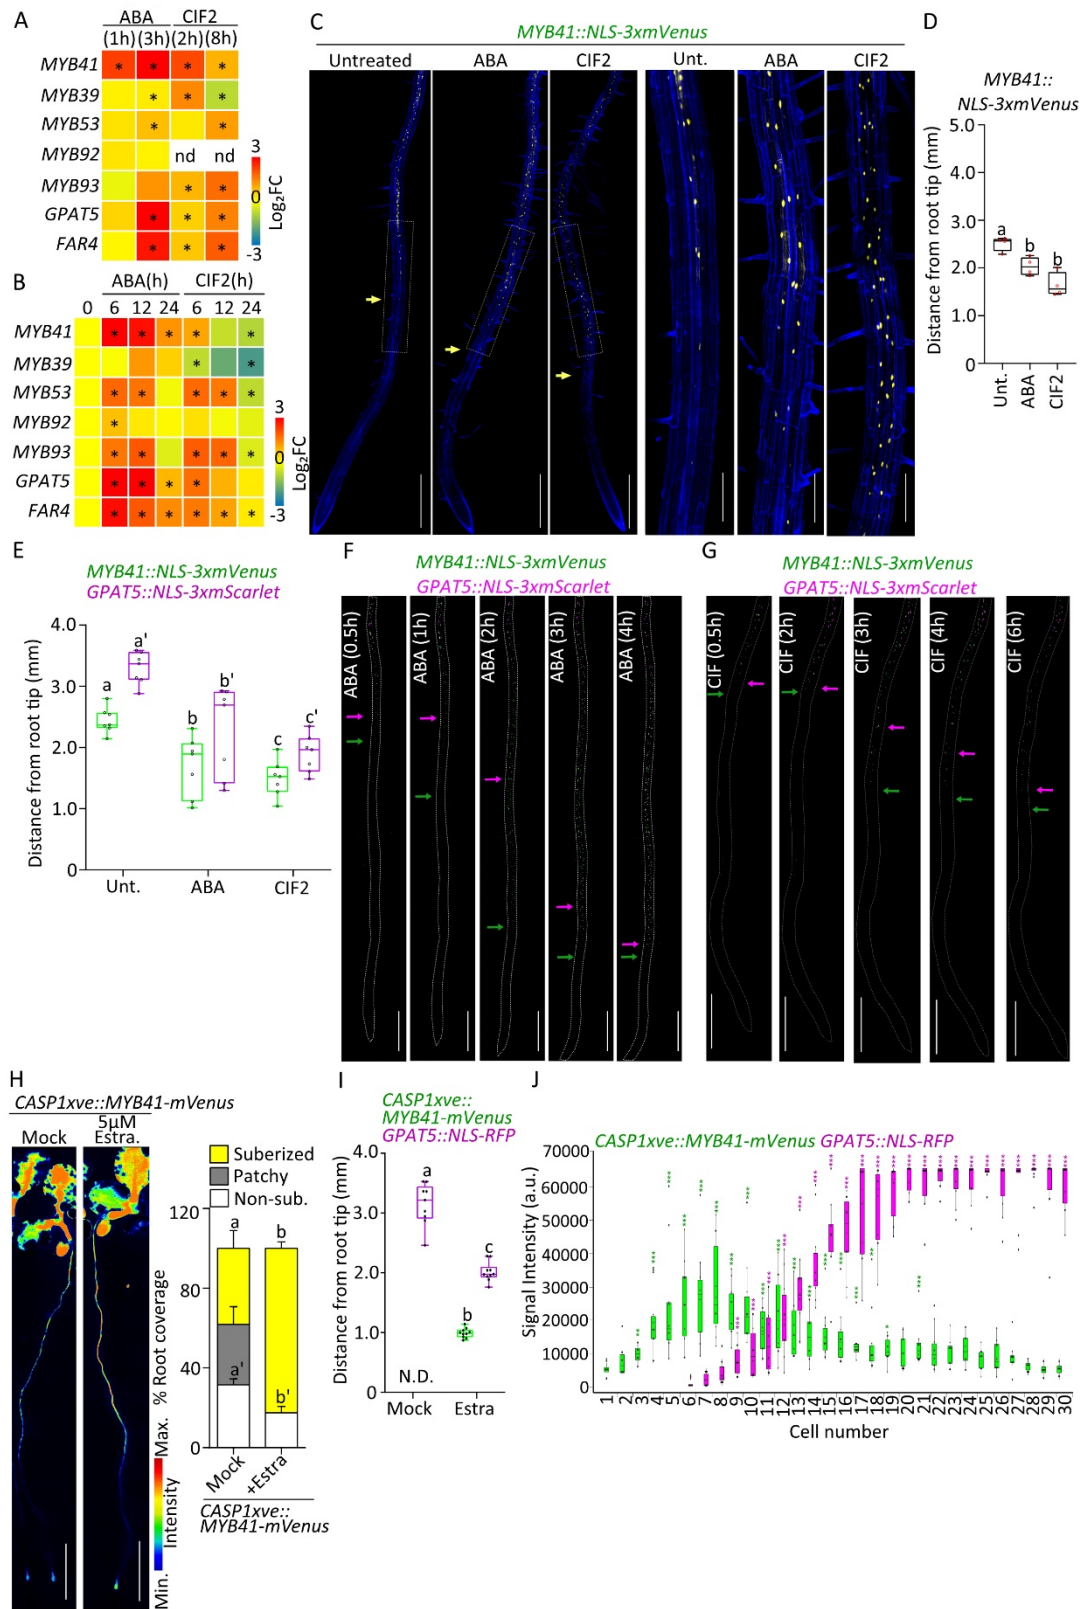

**Figure S2. MYB41 regulation and function in suberin regulation.** (A) Comparative expression profiles of MYB candidate genes upon 1 h and 3 h ABA treatments from a whole seedling microarray dataset (19) and upon 2 h and 8 h CIF2 treatment in a root RNA-seq dataset (20). Asterisks indicate statistically significant differences ( $P < 0.05$ ). (B) Relative expression levels of the candidate MYBs and two suberin biosynthesis genes in WT roots treated with 1  $\mu$ M ABA or 1  $\mu$ M CIF2 for 6, 12 and 24 h ( $n = 4$  pools of 25–30 roots). Results are presented as fold changes compared to the mock condition. Numeric values are presented in Table S3. Asterisks indicate statistically significant differences ( $P < 0.05$ ). (C) MYB41::NLS-3xmVenus expression (in yellow) untreated or treated with 1

$\mu\text{M}$  ABA or  $1 \mu\text{M}$  CIF2 for 16 h. Pictures are presented as maximum intensity Z projections taken from the root tip to 4 - 5 mm (*Left panels*) with closer views in the zone of patchy suberization in untreated condition. Propidium iodide (PI, in blue) was used to highlight cells. Scale bars,  $500 \mu\text{m}$  (*Left*),  $125 \mu\text{m}$  (*Right*). (*D*) Distance from the root tip to the first endodermal cell with NLS-3xmVenus signal in *MYB41::NLS-3xmVenus* background (mm). Data are presented as box plots with individual values overlaid,  $n \geq 5$ , different letters indicate significant differences between conditions ( $P < 0.05$ ). (*E*) Distance from the root tip to the first endodermal cell with NLS-3xmScarlet and NLS-3xmVenus signals in *GPAT5::NLS-3xmScarlet* x *MYB41::NLS-3xmVenus* background. Data are presented as box plots with individual values overlaid,  $n \geq 7$ , different letters indicate significant differences between conditions ( $P < 0.05$ ). (*F-G*) Live imaging of the dual reporter for *GPAT5::NLS-3xmScarlet* and *MYB41::NLS-3xmVenus* upon treatment with  $1 \mu\text{M}$  ABA (*F*) or  $1 \mu\text{M}$  CIF2 (*G*). Pictures are presented as maximum intensity Z projections from the root tip to 4-5 mm. Time course after ABA and CIF2 treatments (0.5 to 4/6 h). Arrows highlight the onset of *MYB41* (green) and *GPAT5* (magenta) expression. Scale bars,  $500 \mu\text{m}$ . (*H*) Fluorol Yellow staining for suberin of *CASPIxve::MYB41* after 16 h of mock or  $5 \mu\text{M}$  Estradiol treatment. Whole-mount staining (*Left panels*) and quantifications of suberin pattern are presented (*Right panel*),  $n \geq 10$ , error bars, standard deviation, different letters indicate significant differences between conditions ( $P < 0.05$ ). Scale bars, 2 mm. (*I*) Distance from the root tip to the first endodermal cell with MYB41-mVenus and NLS-RFP signals in *CASPIxve::MYB41-mVenus* x *GPAT5::NLS-RFP* background. Data are presented as box plots with individual values overlaid,  $n \geq 7$ , different letters indicate significant differences between conditions ( $P < 0.05$ ). (*J*) Signal intensity for MYB41-mVenus (green) and NLS-RFP (magenta) along 30 endodermal cells from the onset of *MYB41-mVenus* signal in the background *CASPIxve::MYB41-mVenus* x *GPAT5::NLS-RFP* after  $5 \mu\text{M}$  Estradiol (Estra.) treatment for 16 h. Data are presented as box plot with individual values overlaid,  $n = 10$ , significant differences to the first cell with signal (cell 1 for MYB41-mVenus and cell 6 for NLS-RFP), \*  $P < 0.05$ , \*\*  $P < 0.005$ , \*\*\*  $P < 0.0005$ .



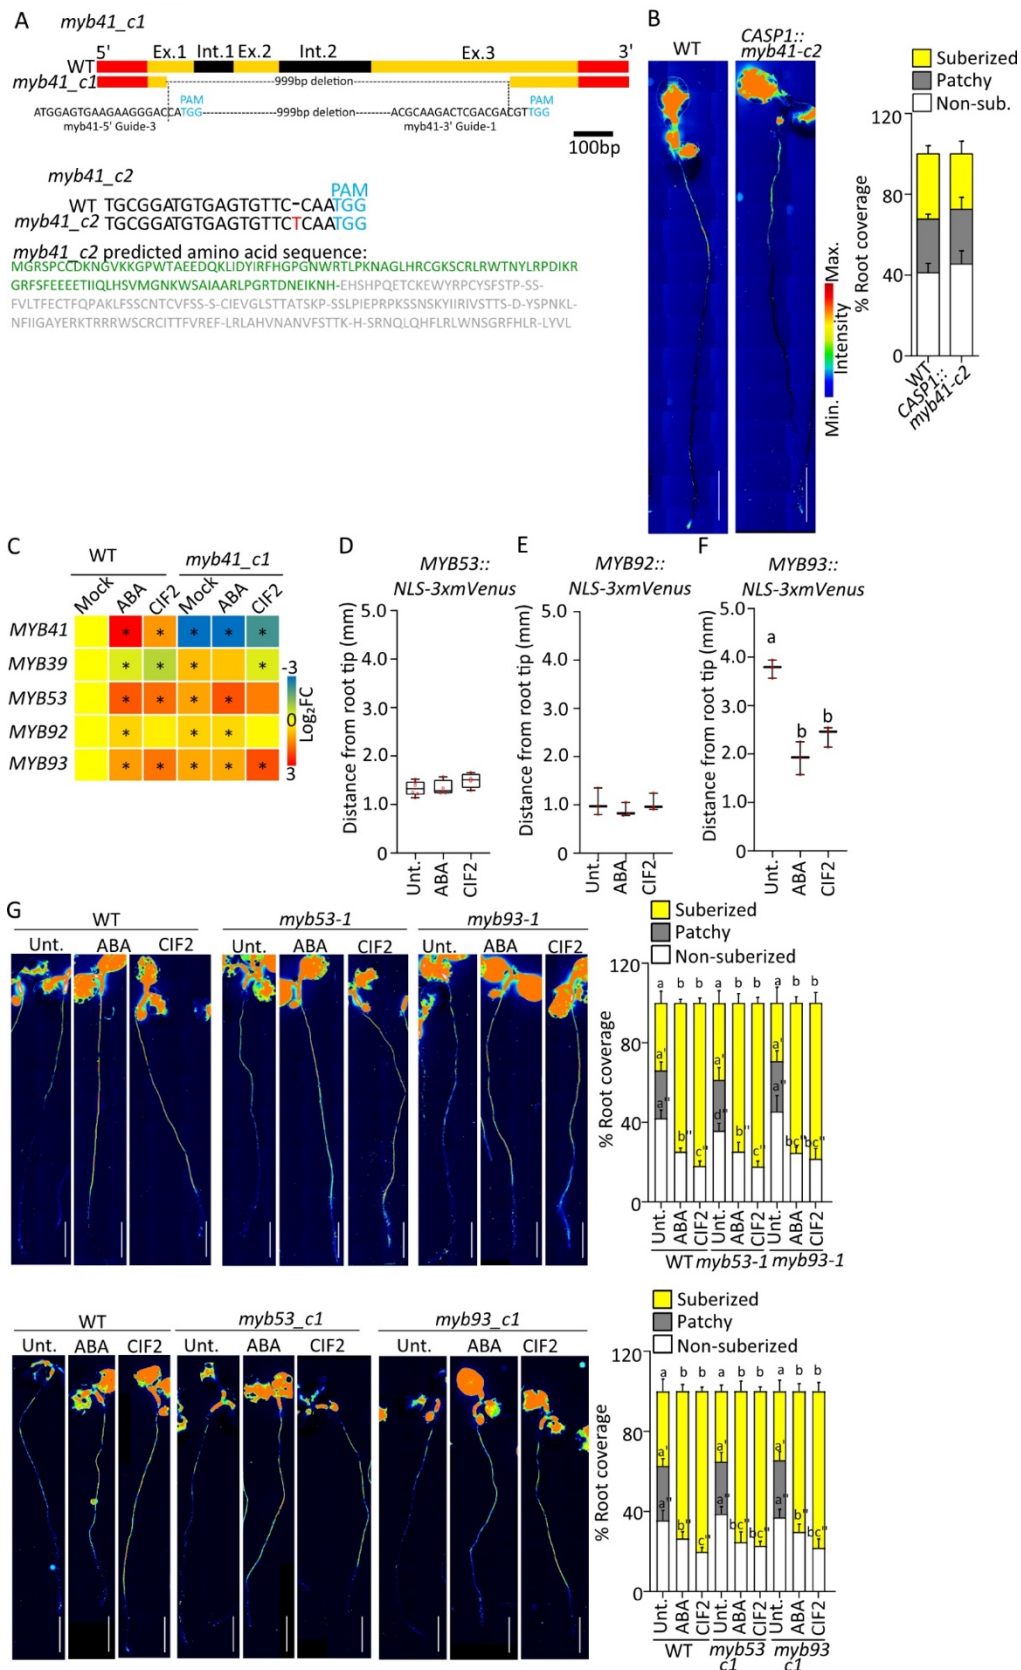

**Figure S3. Characterization of candidate MYBs - MYB41, MYB53, MYB92 and MYB93.** (A) Schematic representation of CRISPR mutations in *myb41\_c1* and *myb41\_c2* mutants. (B) Fluorol Yellow staining for suberin of *CASP1::myb41\_c2*. Whole-mount staining (Left panels) and quantifications of suberin pattern are presented (Right panel),  $n \geq 10$ , error bars, standard deviation. No significant difference observed between genotypes. Scale bars, 2 mm. (C) Relative expression levels of the candidate MYB genes in the roots of *myb41\_c1* compared to WT

after 8 h treatment with 1  $\mu$ M ABA or 1  $\mu$ M CIF2 (n = 4 pools of 25-30 roots). Results are presented as fold changes compared to the WT in mock condition. Numeric values are presented in Table S3. Asterisks indicate statistically significant differences ( $P < 0.05$ ). (D-F) Distance from the root tip to the first endodermal cell with NLS-3xmVenus in (D) *MYB53::NLS-3xmVenus*, (E) *MYB92::NLS-3xmVenus* and (F) *MYB93::NLS-3xmVenus* backgrounds. Data are presented as box plots with individual values overlaid,  $n \geq 3$ , different letters indicate significant differences between conditions ( $P < 0.05$ ). (G) FY staining of WT, *myb53* and *myb93* mutant alleles untreated or treated with 1  $\mu$ M ABA or 1  $\mu$ M CIF2 for 16 h. Different letters indicate significant differences between conditions for a given genotype ( $P < 0.05$ ). The WT control in upper and bottom panels are also shown in Figure 3 F, as they are extracted from the same experiments. Scale bars, 2 mm.

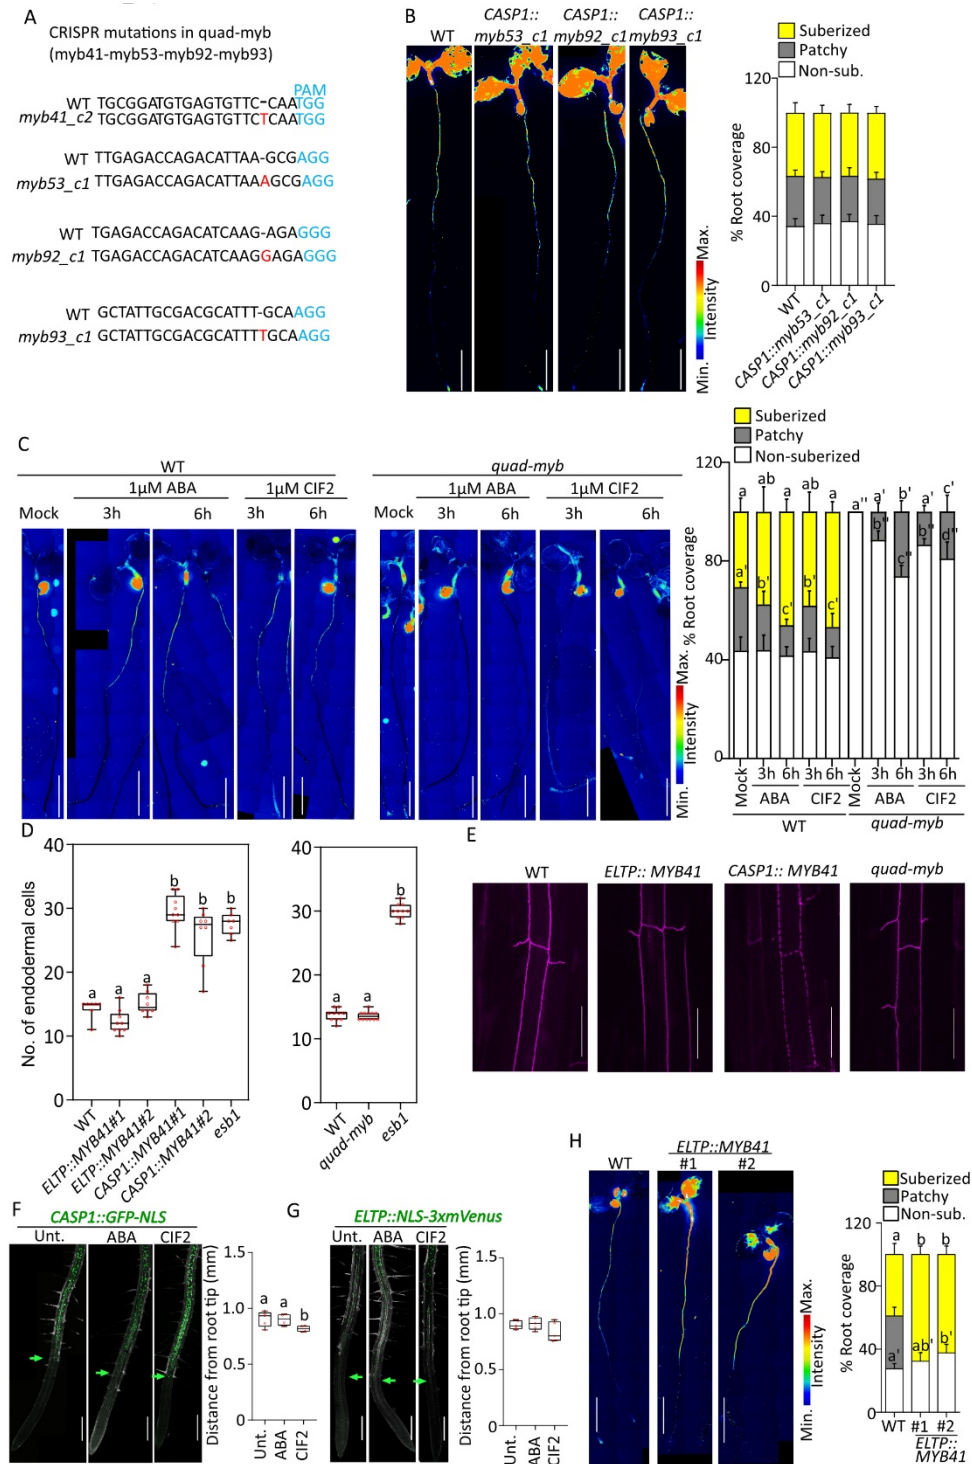

**Figure S4. *quad-myb* mutant and *CASP1::MYB41* and *ELTP::MYB41* characterization.** (A) Schematic representation of CRISPR mutations introduced in *MYB41*, *MYB52*, *MYB92* and *MYB93* to generate a quadruple *myb41-mab53-mab92-myb93* (*quad-myb*) mutant. (B, C, H) Fluorol Yellow (FY) staining for suberin. Whole-mount staining (Left panels) and quantifications of suberin pattern along the root (Right panels),  $n \geq 10$ , error bars, standard deviation, different letters indicate significant differences between conditions or genotypes ( $P < 0.05$ ). Scale bars, 2 mm. (B) FY staining of WT and *CASP1::myb53\_c1*, *CASP1::myb92\_c1* and *CASP1::myb93\_c1*. (C) FY staining of WT and *quad-myb* mutant untreated or treated with 1  $\mu$ M ABA or 1  $\mu$ M CIF2 treatment for 3 or 6 h. Different letters indicate significant differences between conditions for a given genotype. (D) Establishment of a functional apoplastic barrier in different lines and mutants generated in this study compared to WT and *esb1*. Apoplastic barrier function of the endodermis was evaluated with PI diffusion assay. Numbers indicate the average number of endodermal cells from the onset of endodermal cell elongation, where PI uptake is blocked at the level of the endodermis. Data are presented as box plots with individual values overlaid,  $n \geq 7$ . Different letters indicate

significant differences between genotypes ( $P < 0.05$ ). (E) Lignin staining for visualization of Casparian strips in lines and mutants generated in this study compared to WT. Pictures were taken around 20-25 cells after the onset of elongation, scale bars, 50 $\mu$ m. (F) *CASPI::NLS-GFP* expression (in Green) untreated or treated with 1  $\mu$ M ABA or 1  $\mu$ M CIF2 for 16 h. (G) *ELTP::NLS-3xmVenus* expression (in Green) untreated or treated with 1  $\mu$ M ABA or 1  $\mu$ M CIF2 for 16 h. (F-G) Pictures (*Left panels*) are presented as maximum intensity Z projections taken from the root tip to 4 - 5 mm. Propidium iodide (PI, in grey) was used to highlight cells. Scale bars, 500  $\mu$ m Distance from the root tip to the first endodermal cell with GFP-NLS or NLS-3xmVenus signals in *CASPI::NLS-GFP* and *ELTP::NLS-3xmVenus* backgrounds respectively. Data are presented as box plots with individual values overlaid,  $n \geq 5$ , different letters indicate significant differences between conditions ( $P < 0.05$ ) (*Right panels*). (H) FY staining of *ELTP::MYB41* compared to WT seedlings.

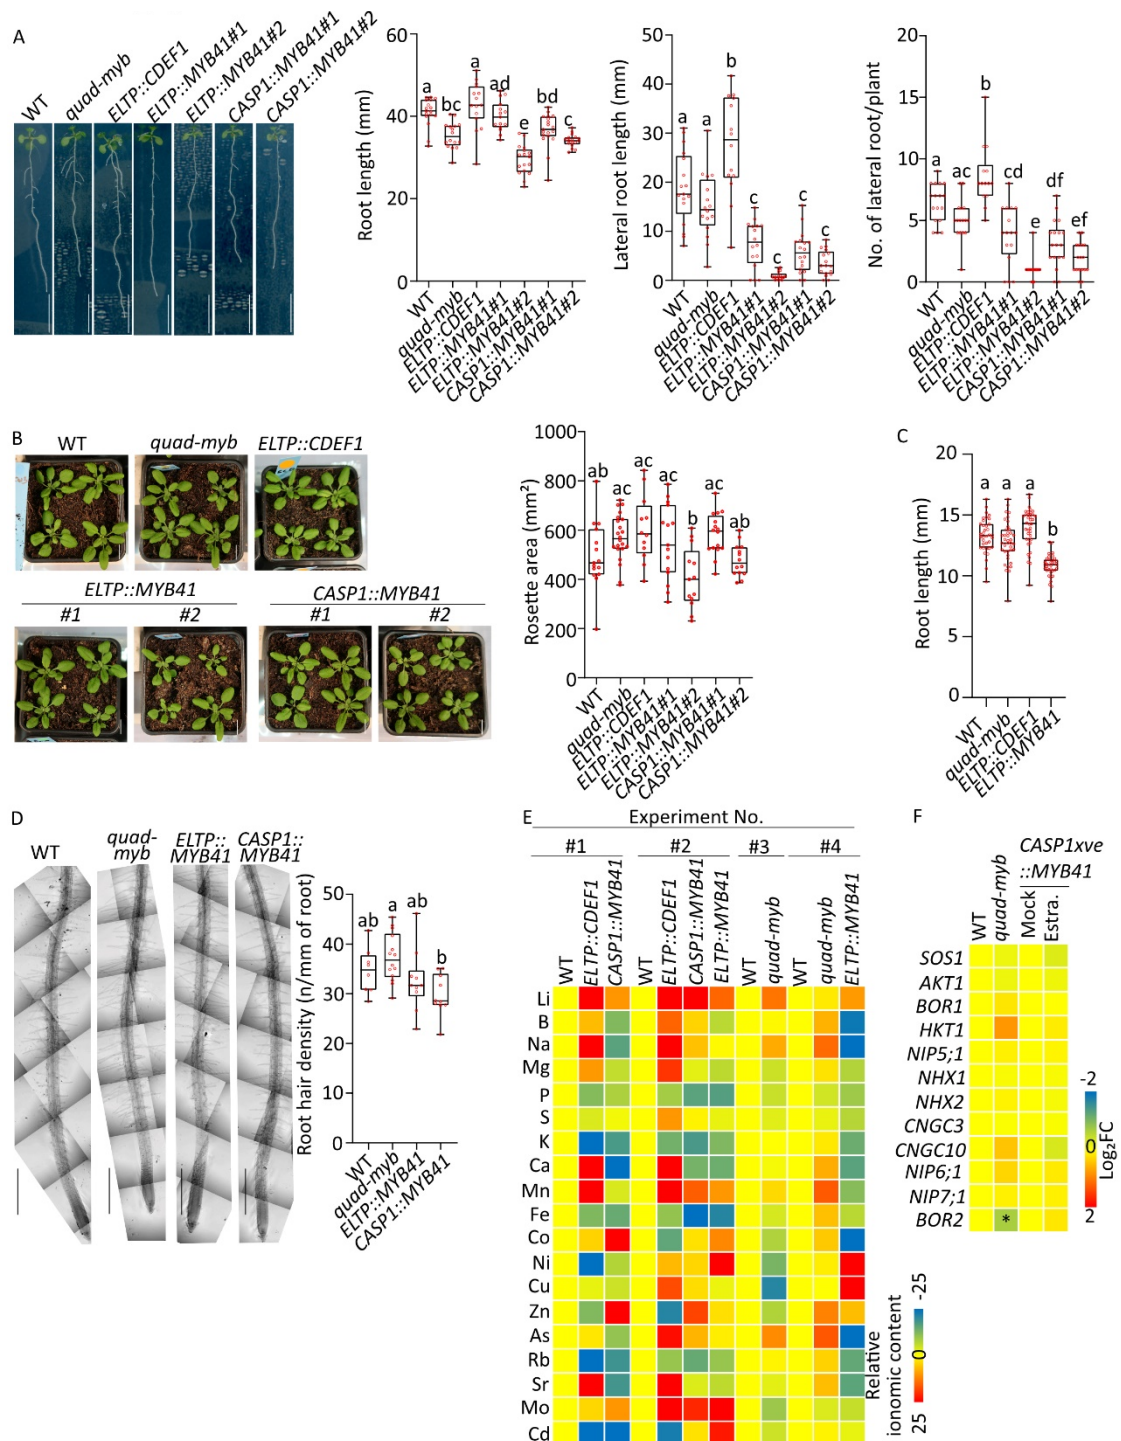

**Figure S5 Phenotypic characterization of *quad-myb* mutant and *CASP1::MYB41* and *ELTP::MYB41* lines.** (A) Root phenotype of 9-day-old WT, *quad-myb*, *ELTP::CDEF1*, *ELTP::MYB41* and *CASP1::MYB41* lines. Pictures (Left panels) and quantifications of primary root length, lateral root length and lateral root numbers are presented (Right panels). Data are presented as box plots with individual values overlaid,  $n \geq 15$ , different letters indicate significant differences between lines ( $P < 0.05$ ). Scale bars, 10 mm. (B) Pictures of 21-day-old WT, *quad-myb*, *ELTP::CDEF1*, *ELTP::MYB41* and *CASP1::MYB41* lines grown in soil (Left panels) and quantification of rosette area (Right panel). Data are presented as box plots with individual values overlaid,  $n \geq 8$ , different letters indicate significant differences between lines ( $P < 0.05$ ). Scale bars, 10 mm. (C) Quantification of primary root length of 5-day-old WT, *quad-myb*, *ELTP::CDEF1*, and *ELTP::MYB41* lines. Data are presented as box plots with individual values overlaid,  $n \geq 15$ , different letters indicate significant differences between lines ( $P < 0.05$ ). (D) Root hair density of seven-day-old WT, *quad-myb*, *ELTP::MYB41* and *CASP1::MYB41* (Left panels) and quantification (Right panel). Data are presented as box plots with individual values overlaid ( $n \geq 10$ ), different

letters indicate significant differences between lines ( $P < 0.05$ ). Scale bars, 500  $\mu\text{m}$ . (E) Ionic profiling of leaves of WT, *ELTP::CDEF1*, *quad-myb*, *ELTP::MYB41* and *CASPI::MYB41* plants from 4 independent experiments. Elements were determined by ICP-MS. Results are presented as fold changes compared to the WT. Numeric values are presented in Table S4. Experiment 1, and 2: 7-day old plants (n=3 pools of 50); Experiments 3 and 4: 5-day old plants (n=3 pools of 100). (F) Relative expression levels of genes encoding nutrient transporters involved in B, Na, Ca, As, and/or Sr acquisition, in the roots of *quad-myb* mutant compared to WT and *CASPIxve::MYB41-mVenus* treated with 5  $\mu\text{M}$  Estradiol for 6 h (n = 4 pools of 25-30 roots). Results are presented as fold changes compared to the WT. Numeric values are presented in Table S3. Asterisks indicate statistical significance ( $P < 0.05$ ).

**Supplemental Table 1.** Nucleotide sequence of primers used for cloning in this study

| Cloning primers                    |                      |                                                                                     |
|------------------------------------|----------------------|-------------------------------------------------------------------------------------|
| <i>promMYB41</i>                   | promMYB41_attB_fw    | GGGGACAACCTTTGTATAGAAAAGTTGTATCACATATCAACACTCATCA<br>AGTATTCATATTTAAGATTAATCAAATAAC |
|                                    | promMYB41_attB_rv    | GGGGACTGCTTTTTTGTACAAAACCTGTCTTTTGTGTTTCGCACAACCTT<br>TAAATTTCTGA                   |
| <i>promMYB53</i>                   | promMYB53_attB_fw    | GGGGACAACCTTTGTATAGAAAAGTTGTATTATGCAGGTATTTGGATT<br>TCTTTTGT                        |
|                                    | promMYB53_attB_rv    | GGGGACTGCTTTTTTGTACAAAACCTGTCCGTTGTAGATACAGAAGTTG<br>ATCAAACATG                     |
| <i>promMYB92</i>                   | promMYB92_attB_fw    | GGGGACAACCTTTGTATAGAAAAGTTGTATGTACAACATGCTATCCTAT<br>AGTAACC                        |
|                                    | promMYB92_attB_rv    | GGGGACTGCTTTTTTGTACAAAACCTGTGTAGATGATCTTCTTCTCT<br>GTATC                            |
| <i>promMYB93</i>                   | promMYB93_attB_fw    | GGGGACAACCTTTGTATAGAAAAGTTGTAAATTAACAGTATGTAAGTG<br>C                               |
|                                    | promMYB93_attB_rv    | GGGGACTGCTTTTTTGTACAAAACCTGTCTCTCTGATTAGGTTGTC<br>G                                 |
| <i>MYB41_CDS</i>                   | MYB41_attB_fw        | GGGGACAAGTTTGTACAAAAAAGCAGGCTTAATGGGAAGATCACC                                       |
|                                    | MYB41_attB_rv        | GGGGACCACTTTGTACAAGAAAGCTGGGTTTTAAAAACATAAAGTCATC<br>TAAGATG                        |
| <i>MYB41nostop_CDS</i>             | MYB41ns_attB_fw      | GGGGACAAGTTTGTACAAAAAAGCAGGCTTAATGGGAAGATCACC<br>GTTGTGATAAAAAATG                   |
|                                    | MYB41ns_attB_rv      | GGGGACCACTTTGTACAAGAAAGCTGGGTTAAACATAAAGTCATCTAA<br>GATGAAATCTCCGGAA                |
| <i>MYB53_CDS</i>                   | MYB53_attB_fw        | GGGGACAAGTTTGTACAAAAAAGCAGGCTTAATGGGAAGATCTCCTA<br>GCTC                             |
|                                    | MYB53_attB_rv        | GGGGACCACTTTGTACAAGAAAGCTGGGTCCAGACATTTCTTATCAAT<br>CTTAA                           |
| <i>MYB92_CDS</i>                   | MYB92_attB_fw        | GGGGACAAGTTTGTACAAAAAAGCAGGCTTAATGGGAAGATCTCCTAT<br>CTCTGATG                        |
|                                    | MYB92_attB_rv        | GGGGACCACTTTGTACAAGAAAGCTGGGTGATTCTATATTTCCGACA<br>TTCCCTTAG                        |
| <i>MYB93_CDS</i>                   | MYB93_attB_fw        | GGGGACAAGTTTGTACAAAAAAGCAGGCTTAATGGGGAGGTCGCCTT<br>GTTGCG                           |
|                                    | MYB93_attB_rv        | GGGGACCACTTTGTACAAGAAAGCTGGGTGCCTCATGAACGTTATATC<br>TTAG                            |
| Oligos for CRISPR guides           |                      |                                                                                     |
| <i>myb41_c1</i>                    | myb41_c1_5primeG1_fw | ATTGGAAAAAATCGAAGAGCCAAG                                                            |
|                                    | myb41_c1_5primeG1_rv | AAACCTTGGCTCTFCGATTTTTTC                                                            |
|                                    | myb41_c1_5primeG2_fw | GTCAACTCCATTTTTATCACAACA                                                            |
|                                    | myb41_c1_5primeG2_rv | AAACTGTTGTGATAAAAAATGGAGT                                                           |
|                                    | myb41_c1_5primeG3_fw | ATTGATGGAGTGAAGAAGGGACCA                                                            |
|                                    | myb41_c1_5primeG3_rv | AAACTGGTCCCCTTCTTCACTCCAT                                                           |
|                                    | myb41_c1_3primeG1_fw | ATTGAACGCAAGACTCGACGACGT                                                            |
|                                    | myb41_c1_3primeG1_rv | AAACACGTCGTCGAGTCTTGCGTT                                                            |
|                                    | myb41_c1_3primeG2_fw | GTCATCCAAAGTCAAGAAAGTGC                                                             |
|                                    | myb41_c1_3primeG2_rv | AAACGCACTTTCTTCGACTTTGGA                                                            |
|                                    | myb41_c1_3primeG3_fw | ATTGTAGTCCATATACACAGTTGA                                                            |
|                                    | myb41_c1_3primeG3_rv | AAACTCAACTGTGTATATGGACTA                                                            |
|                                    | <i>myb41_c2</i>      | myb41_c2_fw                                                                         |
| myb41_c2_rv                        |                      | AAACTTGGAACTCACATCCGCA                                                              |
| <i>myb53_c1</i>                    | myb53_fw             | attgTTGAGACCAGACATTAAGCG                                                            |
|                                    | myb53_rv             | aaacCGCTTAATGTCTGGTCTCAA                                                            |
| <i>myb92_c1</i>                    | myb92_fw             | gtcaTGAGACCAGACATCAAGAGA                                                            |
|                                    | myb92_rv             | aaacTCTCTTGTATGTCTGGTCTCA                                                           |
| <i>myb93_c1</i>                    | myb93_fw             | attgGCTATTGCGACGCAATTTGCA                                                           |
|                                    | myb93_rv             | aaacTGCAAAATGCGTCGCAATAGC                                                           |
| Primers for genotyping T-DNA lines |                      |                                                                                     |
| <i>myb53</i>                       | SALK_076713_LP       | CATCCTTGTGGTGACATCTGTT                                                              |
|                                    | SALK_076713_RP       | ATCACCAGTAACATTTAGGATAAAGT                                                          |
| <i>myb92</i>                       | SM_3_41690_LP        | TGGAATTTAGGGTTTTTCAGGG                                                              |
|                                    | SM_3_41690_RP        | GCAAGCAACCAAATCTCAGAG                                                               |
| <i>myb93</i>                       | SALK_131752_LP       | TGTTGGTTAATGAAGCCGAAG                                                               |
|                                    | SALK_131752_RP       | GGCTTCGTCGCTAGCTAGAAG                                                               |

**Supplemental Table 2.** Nucleotide sequence of primers used for real-time analysis in this study

| Primer name | AGI              | Gene name       | Primer sequence           |
|-------------|------------------|-----------------|---------------------------|
| ACTIN2/8 fw | <i>At3g18780</i> | <i>ACTIN2/8</i> | GGTAACATTGTGCTCAGTGGTGG   |
| ACTIN2/8 rv | <i>At3g18780</i> | <i>ACTIN2/8</i> | AACGACCTTAATCTTCATGCTGC   |
| GPAT4 fw    | <i>At1g01610</i> | <i>GPAT4</i>    | TGAAAGAGTTCGGCGATGACTCAC  |
| GPAT4 rv    | <i>At1g01610</i> | <i>GPAT4</i>    | CATGCACCATGTAACCTTCCTTGC  |
| KCS2 fw     | <i>At1g04220</i> | <i>KCS2</i>     | TCGCTAAACAGCTTCTTCAGGTTT  |
| KCS2 rv     | <i>At1g04220</i> | <i>KCS2</i>     | TTGATCGGTCGTTGCCATAATACC  |
| MYB93 fw    | <i>At1g34670</i> | <i>MYB93</i>    | GCTCGCAGATTTGAATAGGTGTGG  |
| MYB93 rv    | <i>At1g34670</i> | <i>MYB93</i>    | TTCCCAGAAATGGAGTGGAGATGG  |
| LACS2 fw    | <i>At1g49430</i> | <i>LACS2</i>    | CGCGTAACGACTGATTCTAAGGTC  |
| LACS2 rv    | <i>At1g49430</i> | <i>LACS2</i>    | CAATCCGAATTGCACGCTCGTG    |
| GELP22 fw   | <i>At1g54000</i> | <i>GELP22</i>   | GCTCCGGTGGAAATCTATGACTCTG |
| GELP22 rv   | <i>At1g54000</i> | <i>GELP22</i>   | ACTGACTTTGCCACGAAATCATCG  |
| GELP38 fw   | <i>At1g74460</i> | <i>GELP38</i>   | ACGGGTTTGATAACTCGGATTCGC  |
| GELP38 rv   | <i>At1g74460</i> | <i>GELP38</i>   | ACAATGTGCGACGCTGGAATACACG |
| GELP49 fw   | <i>At2g19050</i> | <i>GELP49</i>   | TGAATACCTCGCCAAAGTCAAC    |
| GELP49 rv   | <i>At2g19050</i> | <i>GELP49</i>   | AGCTCAGCGATAATGTACAGGAATG |
| GELP51 fw   | <i>At2g23540</i> | <i>GELP51</i>   | ACATCTACGCGACCAACTAACCAG  |
| GELP51 rv   | <i>At2g23540</i> | <i>GELP51</i>   | ATCCAATCGGTCCAACGTTCCC    |
| C4H fw      | <i>At2g30490</i> | <i>C4H</i>      | TGAGAGGAAGCAAATTGCGAGTTC  |
| C4H rv      | <i>At2g30490</i> | <i>C4H</i>      | CGGCGACATTGATGTTCTCGAC    |
| PAL1 fw     | <i>At2g37040</i> | <i>PAL1</i>     | GCAGTGCTACCGAAAGAAGTGG    |
| PAL1 rv     | <i>At2g37040</i> | <i>PAL1</i>     | TGTTCCGGATAGCCGATGTTCC    |
| PAL4 fw     | <i>At3g10340</i> | <i>PAL4</i>     | GAAGCCGCCGAATTATGGAAC     |
| PAL4 rv     | <i>At3g10340</i> | <i>PAL4</i>     | CGTACGTAAGCGTACCGATCTTG   |
| GPAT5 fw    | <i>At3g11430</i> | <i>GPAT5</i>    | ACGGATAGGATTTTCCGGTTTC    |
| GPAT5 rv    | <i>At3g11430</i> | <i>GPAT5</i>    | TGTAGTCGCGTGGAAAGATCCG    |
| FAR4 fw     | <i>At3g44540</i> | <i>FAR4</i>     | TCCCGGTTGGATCGAAGGGTTAAG  |
| FAR4 rv     | <i>At3g44540</i> | <i>FAR4</i>     | TGCGACCATGTCCACAGGTATAAG  |
| FAR5 fw     | <i>At3g44550</i> | <i>FAR5</i>     | TCGGTCTGCGATATGATACCAGTG  |
| FAR5 rv     | <i>At3g44550</i> | <i>FAR5</i>     | TGAACCTCCAGCGTGTGTTGG     |
| PAL2 fw     | <i>At3g53260</i> | <i>PAL2</i>     | ACGTACCCGTTGATGTCAGAGAC   |
| PAL2 rv     | <i>At3g53260</i> | <i>PAL2</i>     | AGTCTCACCGTTGGACAAAAGCG   |
| ABC20 fw    | <i>At3g53510</i> | <i>ABC20</i>    | AATTCGCCGCTGGGACAAGTTC    |
| ABC20 rv    | <i>At3g53510</i> | <i>ABC20</i>    | AAACGCCGCTCATGCTCTTCAG    |
| MYB39 fw    | <i>At4g17785</i> | <i>MYB39</i>    | CCCTCCTTGGCAACAAATGGTC    |
| MYB39 rv    | <i>At4g17785</i> | <i>MYB39</i>    | GATCGTTGGTCTTGGCTCGTG     |
| MYB41 fw    | <i>At4g28110</i> | <i>MYB41</i>    | CCAGGGAGGACCGATAACGA      |
| MYB41 rv    | <i>At4g28110</i> | <i>MYB41</i>    | GGCGTGGAGAATGAGTAACAGG    |
| MYB92 fw    | <i>At5g10280</i> | <i>MYB92</i>    | GTCTTGGAAACAAGTGGTCAACG   |
| MYB92 rv    | <i>At5g10280</i> | <i>MYB92</i>    | TATCGGTTCTTGGACGGTGAAGTC  |
| ABC6 fw     | <i>At5g13580</i> | <i>ABC6</i>     | AAGAACGCTTGGATGCTTCGC     |
| ABC6 rv     | <i>At5g13580</i> | <i>ABC6</i>     | GCATCTGCGCAAGTGTAGAACC    |
| FAR1 fw     | <i>At5g22500</i> | <i>FAR1</i>     | TGACCTTATACCGGCAGACATGG   |
| FAR1 rv     | <i>At5g22500</i> | <i>FAR1</i>     | ATTGCTGAATCCCCTGTCTC      |
| CYP86B1 fw  | <i>At5g23190</i> | <i>CYP86B1</i>  | TCCCGTGGATCACAAGAGGTTTC   |
| CYP86B1 rv  | <i>At5g23190</i> | <i>CYP86B1</i>  | AGCTTCCATACGACCCATTTGCC   |
| GELP96 fw   | <i>At5g37690</i> | <i>GELP96</i>   | AACCTACACAATCAGTTACGAC    |
| GELP96 rv   | <i>At5g37690</i> | <i>GELP96</i>   | CCATTGCTTGGACACGGTTCAGG   |
| ASFT fw     | <i>At5g41040</i> | <i>ASFT</i>     | ACGATGTCGTAGACGCCAAGAAC   |
| ASFT rv     | <i>At5g41040</i> | <i>ASFT</i>     | TAGTCACCTGAGCGGTAACAGG    |
| CYP86A1 fw  | <i>At5g58860</i> | <i>CYP86A1</i>  | GTTTACCTCAAGGCTGCTTTGGC   |
| CYP86A1 rv  | <i>At5g58860</i> | <i>CYP86A1</i>  | TGAAATCCTGAGGCACAGAAGGG   |
| FACT fw     | <i>At5g63560</i> | <i>FACT</i>     | CTCCAGTGGTTGTTTCAGGTGAC   |
| FACT rv     | <i>At5g63560</i> | <i>FACT</i>     | ACTCCATGGCTGCGATACCATC    |
| MYB53 fw    | <i>At5g65230</i> | <i>MYB53</i>    | TGCGGTTCTAGGCAACAAGTGG    |
| MYB53 rv    | <i>At5g65230</i> | <i>MYB53</i>    | TCATCGGTTCTTGGCTGATGGG    |
| SOS1 fw     | <i>AT2G01980</i> | <i>SOS1</i>     | GTGGTGTGTGTCATTGCTGAAGGC  |
| SOS1 rv     | <i>AT2G01980</i> | <i>SOS1</i>     | AGAAATCGCCATGAATCCCTTGG   |
| AKT1 fw     | <i>AT2G26650</i> | <i>AKT1</i>     | TGCTTCGTCTTTGGCGTCTTCG    |
| AKT1 rv     | <i>AT2G26650</i> | <i>AKT1</i>     | AGTTGCGGTCCTTCTAGTCTGG    |
| BOR1 fw     | <i>AT2G47160</i> | <i>BOR1</i>     | TCGCTTCTGCGATTCTGTGTCATC  |
| BOR1 rv     | <i>AT2G47160</i> | <i>BOR1</i>     | AACAGCCGTGAGAATCCATCG     |
| HKT1 fw     | <i>AT4G10310</i> | <i>HKT1</i>     | TGGTTTCACTACCGGTTACAGC    |
| HKT1 rv     | <i>AT4G10310</i> | <i>HKT1</i>     | ACCCATAACTCGGCTCTTTGCAG   |
| NIP5;1 fw   | <i>AT4G10380</i> | <i>NIP5;1</i>   | TGTCGGTGGTGTCACTATTCC     |
| NIP5;1 rv   | <i>AT4G10380</i> | <i>NIP5;1</i>   | ATACCTGCAATTTCCAACGG      |
| NHX1 fw     | <i>AT5G27150</i> | <i>NHX1</i>     | AAGAGCAGCGTTCTGCTTTCCG    |
| NHX1 rv     | <i>AT5G27150</i> | <i>NHX1</i>     | ACCAGACCACAAATCACAACCTG   |
| ATCNGC10 fw | <i>AT1G01340</i> | <i>ATCNGC10</i> | ACTTTGGCATCTTCACTGATGCTC  |



|             |                  |                 |                          |
|-------------|------------------|-----------------|--------------------------|
| ATCNGC10_rv | <i>AT1G01340</i> | <i>ATCNGC10</i> | TGGAGATTCTGTCCCAATGCACTC |
| NIP6;1_fw   | <i>AT1G80760</i> | <i>NIP6;1</i>   | TGTTCGTTGTCACAGCCGTAGC   |
| NIP6;1_rv   | <i>AT1G80760</i> | <i>NIP6;1</i>   | TCGAAGCAGAAGTTGCAGGTCCAG |
| ATCNGC3_fw  | <i>AT2G46430</i> | <i>ATCNGC3</i>  | GGTCTCCGCAATCTTAGTGCTTTG |
| ATCNGC3_rv  | <i>AT2G46430</i> | <i>ATCNGC3</i>  | TCTCTCCTTCAAAGGCACTCGTC  |
| ATNHX2_fw   | <i>AT3G05030</i> | <i>ATNHX2</i>   | ACTCGACTGATCGAGAAGTTGCC  |
| ATNHX2_rv   | <i>AT3G05030</i> | <i>ATNHX2</i>   | ACCACTCAAGCGAATAGCTCAG   |
| NIP7;1_fw   | <i>AT3G06100</i> | <i>NIP7;1</i>   | AGCTACGAGCATCGTCGTGTTTC  |
| NIP7;1_rv   | <i>AT3G06100</i> | <i>NIP7;1</i>   | TCGGTCCGGTAATAAGCACTCC   |
| BOR2_fw     | <i>AT3G62270</i> | <i>BOR2</i>     | AAGAAGCACCCGCTTTACCGTTC  |
| BOR2_rv     | <i>AT3G62270</i> | <i>BOR2</i>     | CAGTTGATCCCATCTCAGCTCCG  |

**Supplemental Table 3.** Numerical values of the mRNA levels of the candidate *MYBs* and suberin biosynthetic genes shown in different figures - Fig.2A, Fig.2G, Fig.S2B, Fig.S3C, Fig.4C and Fig.5E

**Fig.2A** Relative expression levels of the candidate *MYBs* and suberin biosynthesis and polymerization genes in WT roots treated with 1  $\mu$ M ABA or 1  $\mu$ M CIF2 for 3 and 6 h (n = 4 pools of 25-30 roots).

| Mock          |             |            | 3h ABA      |            |         | 6h ABA      |            |         |
|---------------|-------------|------------|-------------|------------|---------|-------------|------------|---------|
| Genes         | Renorm_ AVG | Renorm_ SD | Renorm_ AVG | Renorm_ SD | p-value | Renorm_ AVG | Renorm_ SD | p-value |
| <i>MYB41</i>  | 1.00        | 0.14       | 72.66       | 14.41      | 0.002   | 38.61       | 4.10       | 0.000   |
| <i>MYB39</i>  | 1.00        | 0.16       | 0.65        | 0.08       | 0.015   | 0.62        | 0.13       | 0.011   |
| <i>MYB53</i>  | 1.00        | 0.08       | 2.37        | 0.49       | 0.010   | 4.57        | 0.66       | 0.002   |
| <i>MYB92</i>  | 1.00        | 0.13       | 1.04        | 0.23       | 0.796   | 1.38        | 0.16       | 0.010   |
| <i>MYB93</i>  | 1.00        | 0.04       | 2.01        | 0.58       | 0.040   | 3.39        | 0.26       | 0.000   |
| <i>GPAT5</i>  | 1.00        | 0.22       | 15.20       | 2.70       | 0.002   | 17.45       | 0.44       | 0.000   |
| <i>FAR4</i>   | 1.00        | 0.09       | 4.09        | 0.63       | 0.002   | 6.81        | 0.20       | 0.000   |
| <i>KCS2</i>   | 1.00        | 0.11       | 12.47       | 1.57       | 0.001   | 22.97       | 3.85       | 0.001   |
| <i>LACS2</i>  | 1.00        | 0.14       | 2.28        | 0.25       | 0.000   | 5.17        | 0.87       | 0.002   |
| <i>ABCG6</i>  | 1.00        | 0.14       | 23.44       | 4.45       | 0.002   | 39.21       | 7.78       | 0.002   |
| <i>86B1</i>   | 1.00        | 0.12       | 7.78        | 1.65       | 0.004   | 12.41       | 1.53       | 0.001   |
| <i>FAR5</i>   | 1.00        | 0.10       | 4.44        | 0.60       | 0.001   | 8.60        | 0.74       | 0.000   |
| <i>ABCG20</i> | 1.00        | 0.14       | 3.55        | 0.61       | 0.003   | 8.85        | 0.99       | 0.000   |
| <i>FAR1</i>   | 1.00        | 0.24       | 3.01        | 0.48       | 0.001   | 5.05        | 0.27       | 0.000   |
| <i>ASFT</i>   | 1.00        | 0.15       | 14.11       | 3.03       | 0.003   | 23.46       | 3.10       | 0.001   |
| <i>ABCG2</i>  | 1.00        | 0.19       | 8.55        | 0.99       | 0.000   | 11.59       | 1.52       | 0.001   |
| <i>86A1</i>   | 1.00        | 0.13       | 1.59        | 0.20       | 0.004   | 3.92        | 0.87       | 0.006   |
| <i>FACT</i>   | 1.00        | 0.10       | 2.85        | 0.59       | 0.007   | 4.74        | 0.73       | 0.002   |
| <i>GPAT4</i>  | 1.00        | 0.24       | 4.36        | 1.06       | 0.006   | 6.62        | 0.94       | 0.001   |
| <i>PAL1</i>   | 1.00        | 0.26       | 2.41        | 0.29       | 0.000   | 3.63        | 0.36       | 0.000   |
| <i>PAL2</i>   | 1.00        | 0.19       | 1.13        | 0.13       | 0.297   | 1.41        | 0.29       | 0.065   |
| <i>PAL4</i>   | 1.00        | 0.19       | 11.13       | 2.77       | 0.005   | 22.75       | 4.38       | 0.002   |
| <i>C4H</i>    | 1.00        | 0.22       | 2.01        | 0.19       | 0.001   | 2.84        | 0.38       | 0.000   |
| <i>GELP22</i> | 1.00        | 0.55       | 6.10        | 1.98       | 0.011   | 10.55       | 1.85       | 0.001   |
| <i>GELP38</i> | 1.00        | 0.16       | 1.60        | 0.16       | 0.002   | 2.29        | 0.31       | 0.001   |
| <i>GELP49</i> | 1.00        | 0.07       | 28.04       | 6.77       | 0.004   | 35.21       | 9.10       | 0.005   |
| <i>GELP51</i> | 1.00        | 0.07       | 2.67        | 0.63       | 0.012   | 3.90        | 0.76       | 0.004   |
| <i>GELP96</i> | 1.00        | 0.18       | 8.57        | 2.61       | 0.010   | 21.96       | 4.65       | 0.003   |
| Mock          |             |            | 3h CIF      |            |         | 6h CIF      |            |         |
| Genes         | Renorm_ AVG | Renorm_ SD | Renorm_ AVG | Renorm_ SD | p-value | Renorm_ AVG | Renorm_ SD | p-value |
| <i>MYB41</i>  | 1.00        | 0.14       | 7.18        | 1.04       | 0.001   | 4.89        | 3.13       | 0.089   |
| <i>MYB39</i>  | 1.00        | 0.16       | 1.16        | 0.28       | 0.364   | 0.58        | 0.40       | 0.123   |
| <i>MYB53</i>  | 1.00        | 0.08       | 1.93        | 0.44       | 0.022   | 2.51        | 0.34       | 0.002   |
| <i>MYB92</i>  | 1.00        | 0.13       | 0.96        | 0.09       | 0.605   | 1.04        | 0.12       | 0.658   |
| <i>MYB93</i>  | 1.00        | 0.04       | 3.21        | 0.39       | 0.001   | 3.30        | 0.40       | 0.001   |
| <i>GPAT5</i>  | 1.00        | 0.22       | 2.39        | 0.28       | 0.000   | 4.12        | 2.08       | 0.057   |
| <i>FAR4</i>   | 1.00        | 0.09       | 1.90        | 0.25       | 0.003   | 2.20        | 0.33       | 0.004   |
| <i>KCS2</i>   | 1.00        | 0.11       | 1.64        | 0.25       | 0.009   | 3.04        | 1.26       | 0.048   |
| <i>LACS2</i>  | 1.00        | 0.14       | 2.28        | 0.40       | 0.005   | 5.29        | 1.20       | 0.005   |
| <i>ABCG6</i>  | 1.00        | 0.14       | 4.24        | 0.73       | 0.002   | 6.80        | 3.22       | 0.036   |
| <i>86B1</i>   | 1.00        | 0.12       | 2.59        | 0.26       | 0.000   | 2.67        | 0.35       | 0.001   |
| <i>FAR5</i>   | 1.00        | 0.10       | 2.80        | 0.33       | 0.001   | 3.86        | 0.44       | 0.001   |
| <i>ABCG20</i> | 1.00        | 0.14       | 2.76        | 0.26       | 0.000   | 5.14        | 2.22       | 0.033   |
| <i>FAR1</i>   | 1.00        | 0.24       | 1.50        | 0.29       | 0.042   | 1.80        | 0.64       | 0.084   |
| <i>ASFT</i>   | 1.00        | 0.15       | 2.24        | 0.21       | 0.000   | 1.99        | 0.66       | 0.053   |
| <i>ABCG2</i>  | 1.00        | 0.19       | 1.90        | 0.45       | 0.022   | 2.39        | 0.62       | 0.016   |
| <i>86A1</i>   | 1.00        | 0.13       | 1.29        | 0.19       | 0.050   | 3.32        | 0.52       | 0.002   |
| <i>FACT</i>   | 1.00        | 0.10       | 1.38        | 0.19       | 0.019   | 1.59        | 0.37       | 0.047   |
| <i>GPAT4</i>  | 1.00        | 0.24       | 1.93        | 0.24       | 0.002   | 2.71        | 0.88       | 0.026   |
| <i>PAL1</i>   | 1.00        | 0.26       | 1.78        | 0.24       | 0.005   | 1.95        | 0.40       | 0.010   |
| <i>PAL2</i>   | 1.00        | 0.19       | 2.01        | 0.15       | 0.000   | 2.11        | 0.26       | 0.001   |
| <i>PAL4</i>   | 1.00        | 0.19       | 2.93        | 0.66       | 0.007   | 3.61        | 1.16       | 0.019   |
| <i>C4H</i>    | 1.00        | 0.22       | 1.62        | 0.11       | 0.006   | 1.51        | 0.35       | 0.055   |
| <i>GELP22</i> | 1.00        | 0.55       | 1.72        | 0.84       | 0.211   | 8.05        | 12.19      | 0.332   |
| <i>GELP38</i> | 1.00        | 0.16       | 1.06        | 0.16       | 0.625   | 2.87        | 2.59       | 0.245   |
| <i>GELP49</i> | 1.00        | 0.07       | 5.69        | 1.12       | 0.004   | 5.39        | 2.45       | 0.037   |
| <i>GELP51</i> | 1.00        | 0.07       | 2.15        | 0.42       | 0.011   | 3.35        | 0.69       | 0.006   |
| <i>GELP96</i> | 1.00        | 0.18       | 4.02        | 0.23       | 0.000   | 5.89        | 2.28       | 0.023   |

**Supplemental Table 3.** Numerical values of the mRNA levels of the candidate *MYBs* and suberin biosynthetic genes shown in different figures - Fig.2A, Fig.2G, Fig.S2B, Fig.S3C, Fig.4C and Fig.5E

**Fig.2G** Relative expression levels of the *MYBs* candidates and suberin biosynthesis and polymerization genes in the roots of *CASPlxve::MYB41-mVENUS* treated with 5  $\mu$ M Estradiol for 3 and 6 h (n = 4 pools of 25-30 roots).

| Genes         | Mock           |               | 3h             |               |             | 6h             |               |             |
|---------------|----------------|---------------|----------------|---------------|-------------|----------------|---------------|-------------|
|               | Renorm_<br>AVG | Renorm_<br>SD | Renorm_<br>AVG | Renorm_<br>SD | p-<br>value | Renorm_<br>AVG | Renorm_<br>SD | p-<br>value |
| <i>MYB41</i>  | 1.00           | 0.07          | 5.81           | 0.53          | 0.000       | 5.54           | 0.64          | 0.001       |
| <i>MYB39</i>  | 1.00           | 0.10          | 0.97           | 0.23          | 0.820       | 0.66           | 0.10          | 0.003       |
| <i>MYB53</i>  | 1.00           | 0.11          | 1.11           | 0.18          | 0.357       | 0.76           | 0.10          | 0.017       |
| <i>MYB92</i>  | 1.00           | 0.10          | 0.88           | 0.14          | 0.225       | 0.69           | 0.04          | 0.004       |
| <i>MYB93</i>  | 1.00           | 0.16          | 1.39           | 0.21          | 0.025       | 1.40           | 0.33          | 0.085       |
| <i>GPAT5</i>  | 1.00           | 0.20          | 2.39           | 0.25          | 0.000       | 2.36           | 0.51          | 0.008       |
| <i>FAR4</i>   | 1.00           | 0.26          | 1.73           | 0.32          | 0.013       | 2.24           | 0.53          | 0.011       |
| <i>KCS2</i>   | 1.00           | 0.19          | 2.22           | 0.16          | 0.000       | 2.00           | 0.16          | 0.000       |
| <i>LACS2</i>  | 1.00           | 0.17          | 1.89           | 0.20          | 0.001       | 2.68           | 0.43          | 0.002       |
| <i>ABCG6</i>  | 1.00           | 0.18          | 3.53           | 0.19          | 0.000       | 3.91           | 0.39          | 0.000       |
| <i>86B1</i>   | 1.00           | 0.33          | 2.16           | 0.22          | 0.002       | 2.27           | 0.51          | 0.008       |
| <i>FAR5</i>   | 1.00           | 0.32          | 1.34           | 0.13          | 0.122       | 1.61           | 0.55          | 0.113       |
| <i>ABCG20</i> | 1.00           | 0.32          | 1.39           | 0.11          | 0.089       | 1.16           | 0.24          | 0.457       |
| <i>FAR1</i>   | 1.00           | 0.08          | 1.12           | 0.14          | 0.201       | 1.23           | 0.22          | 0.123       |
| <i>ASFT</i>   | 1.00           | 0.22          | 1.70           | 0.17          | 0.003       | 1.95           | 0.41          | 0.012       |
| <i>ABCG2</i>  | 1.00           | 0.19          | 1.37           | 0.25          | 0.062       | 1.59           | 0.19          | 0.005       |
| <i>86A1</i>   | 1.00           | 0.35          | 1.20           | 0.10          | 0.341       | 0.94           | 0.10          | 0.760       |
| <i>FACT</i>   | 1.00           | 0.15          | 1.21           | 0.12          | 0.068       | 1.25           | 0.22          | 0.112       |
| <i>GPAT4</i>  | 1.00           | 0.35          | 2.68           | 0.56          | 0.004       | 2.65           | 0.15          | 0.001       |
| <i>PAL1</i>   | 1.00           | 0.10          | 1.62           | 0.14          | 0.000       | 1.60           | 0.19          | 0.004       |
| <i>PAL2</i>   | 1.00           | 0.12          | 1.54           | 0.18          | 0.004       | 1.93           | 0.45          | 0.021       |
| <i>C4H</i>    | 1.00           | 0.26          | 1.44           | 0.08          | 0.035       | 1.78           | 0.40          | 0.021       |
| <i>PAL4</i>   | 1.00           | 0.38          | 1.95           | 0.40          | 0.014       | 2.07           | 0.30          | 0.005       |
| <i>GELP22</i> | 1.00           | 0.57          | 4.14           | 0.73          | 0.005       | 2.38           | 2.20          | 0.306       |
| <i>GELP38</i> | 1.00           | 0.20          | 1.49           | 0.76          | 0.292       | 0.87           | 0.17          | 0.351       |
| <i>GELP49</i> | 1.00           | 0.23          | 4.16           | 0.63          | 0.001       | 4.68           | 1.01          | 0.004       |
| <i>GELP51</i> | 1.00           | 0.39          | 2.07           | 0.75          | 0.058       | 1.65           | 0.66          | 0.152       |
| <i>GELP96</i> | 1.00           | 0.56          | 1.11           | 0.09          | 0.728       | 1.02           | 0.42          | 0.954       |

**Supplemental Table 3.** Numerical values of the mRNA levels of the candidate *MYBs* and suberin biosynthetic genes shown in different figures - Fig.2A, Fig.2G, Fig.S2B, Fig.S3C, Fig.4C and Fig.5E

**Fig.S2B** Relative expression levels of the candidate *MYBs* and suberin biosynthesis and polymerization genes in WT roots treated with 1  $\mu$ M ABA or 1  $\mu$ M CIF2 for 6h, 12h and 24h (n = 4 pools of 25-30 roots).

| Genes        | 0h         |           | 6h Mock    |           | 6h ABA     |           |         | 6h CIF     |           |         |
|--------------|------------|-----------|------------|-----------|------------|-----------|---------|------------|-----------|---------|
|              | Renorm AVG | Renorm SD | Renorm AVG | Renorm SD | Renorm AVG | Renorm SD | p-value | Renorm AVG | Renorm SD | p-value |
| <i>MYB41</i> | 1.00       | 0.17      | 1.00       | 0.15      | 20.66      | 2.72      | 0.001   | 2.09       | 0.21      | 0.000   |
| <i>MYB39</i> | 1.00       | 0.14      | 1.00       | 0.47      | 0.97       | 0.14      | 0.797   | 0.60       | 0.08      | 0.006   |
| <i>MYB53</i> | 1.00       | 0.30      | 1.00       | 0.07      | 3.46       | 0.31      | 0.000   | 3.40       | 0.66      | 0.005   |
| <i>MYB92</i> | 1.00       | 0.19      | 1.00       | 0.13      | 1.68       | 0.18      | 0.001   | 1.29       | 0.21      | 0.073   |
| <i>MYB93</i> | 1.00       | 0.28      | 1.00       | 0.63      | 3.06       | 0.17      | 0.000   | 3.78       | 0.55      | 0.002   |
| <i>GPAT5</i> | 1.00       | 0.22      | 1.00       | 0.43      | 15.73      | 1.32      | 0.000   | 3.24       | 0.49      | 0.002   |
| <i>FAR4</i>  | 1.00       | 0.27      | 1.00       | 0.50      | 7.23       | 0.70      | 0.000   | 3.02       | 0.37      | 0.001   |

| Genes        | 12h Mock   |           | 12h ABA    |           |         | 12h CIF    |           |         |
|--------------|------------|-----------|------------|-----------|---------|------------|-----------|---------|
|              | Renorm AVG | Renorm SD | Renorm AVG | Renorm SD | p-value | Renorm AVG | Renorm SD | p-value |
| <i>MYB41</i> | 1.000      | 0.707     | 7.05       | 2.39      | 0.011   | 0.62       | 0.34      | 0.387   |
| <i>MYB39</i> | 1.000      | 0.815     | 2.35       | 2.26      | 0.331   | 0.29       | 0.15      | 0.235   |
| <i>MYB53</i> | 1.000      | 0.241     | 3.13       | 0.49      | 0.001   | 3.01       | 0.36      | 0.000   |
| <i>MYB92</i> | 1.000      | 0.211     | 1.21       | 0.20      | 0.211   | 0.94       | 0.20      | 0.681   |
| <i>MYB93</i> | 1.000      | 0.791     | 3.96       | 0.74      | 0.002   | 3.52       | 0.58      | 0.001   |
| <i>GPAT5</i> | 1.000      | 0.768     | 8.03       | 1.70      | 0.003   | 1.90       | 0.96      | 0.162   |
| <i>FAR4</i>  | 1.000      | 0.893     | 3.98       | 0.29      | 0.000   | 2.12       | 0.22      | 0.000   |

| Genes        | 24h Mock   |           | 24h ABA    |           |         | 24h CIF    |           |         |
|--------------|------------|-----------|------------|-----------|---------|------------|-----------|---------|
|              | Renorm AVG | Renorm SD | Renorm AVG | Renorm SD | p-value | Renorm AVG | Renorm SD | p-value |
| <i>MYB41</i> | 1.000      | 0.240     | 2.41       | 0.47      | 0.004   | 0.54       | 0.10      | 0.025   |
| <i>MYB39</i> | 1.000      | 0.605     | 1.48       | 0.78      | 0.311   | 0.23       | 0.07      | 0.004   |
| <i>MYB53</i> | 1.000      | 0.187     | 0.91       | 0.43      | 0.726   | 0.59       | 0.20      | 0.026   |
| <i>MYB92</i> | 1.000      | 0.145     | 1.06       | 0.13      | 0.557   | 0.81       | 0.14      | 0.115   |
| <i>MYB93</i> | 1.000      | 0.439     | 0.78       | 0.15      | 0.060   | 0.75       | 0.09      | 0.016   |
| <i>GPAT5</i> | 1.000      | 0.476     | 1.80       | 0.45      | 0.032   | 1.17       | 0.16      | 0.158   |
| <i>FAR4</i>  | 1.000      | 0.540     | 2.56       | 0.19      | 0.000   | 1.19       | 0.07      | 0.019   |

**Supplemental Table 3.** Numerical values of the mRNA levels of the candidate *MYBs* and suberin biosynthetic genes shown in different figures - Fig.2A, Fig.2G, Fig.S2B, Fig.S3C, Fig.4C and Fig.5E

**Fig.S3C** Relative expression levels of the candidate *MYB* genes in the roots of *myb41\_c1* compared to WT after 8 h treatment with 1  $\mu$ M ABA or 1  $\mu$ M CIF2 (n = 4 pools of 25-30 roots).

|              | WT              |               | WT_ABA         |                     |               | WT_CIF2        |                      |               |         |  |
|--------------|-----------------|---------------|----------------|---------------------|---------------|----------------|----------------------|---------------|---------|--|
| Genes        | Renorm_<br>AVG  | Renorm_<br>SD | Renorm_<br>AVG | Renorm_<br>SD       | p-value       | Renorm_<br>AVG | Renorm_<br>SD        | p-value       |         |  |
| <i>MYB41</i> | 1.00            | 0.18          | 14.99          | 1.74                | 0.000         | 2.33           | 0.33                 | 0.001         |         |  |
| <i>MYB39</i> | 1.00            | 0.07          | 0.76           | 0.02                | 0.005         | 0.56           | 0.09                 | 0.000         |         |  |
| <i>MYB53</i> | 1.00            | 0.26          | 3.96           | 0.69                | 0.002         | 3.32           | 0.33                 | 0.000         |         |  |
| <i>MYB92</i> | 1.00            | 0.19          | 1.42           | 0.14                | 0.014         | 1.16           | 0.17                 | 0.266         |         |  |
| <i>MYB93</i> | 1.00            | 0.20          | 2.26           | 0.13                | 0.000         | 3.09           | 0.66                 | 0.006         |         |  |
| <i>GPAT5</i> | 1.00            | 0.14          | 9.72           | 1.41                | 0.001         | 2.60           | 0.44                 | 0.003         |         |  |
| <i>FAR4</i>  | 1.00            | 0.14          | 4.24           | 0.32                | 0.000         | 2.40           | 0.53                 | 0.010         |         |  |
|              | <i>myb41_c1</i> |               |                | <i>myb41_c1_ABA</i> |               |                | <i>myb41_c1_CIF2</i> |               |         |  |
| Genes        | Renorm_<br>AVG  | Renorm_<br>SD | p-value        | Renorm_<br>AVG      | Renorm_<br>SD | p-value        | Renorm_<br>AVG       | Renorm_<br>SD | p-value |  |
| <i>MYB41</i> | 0.01            | 0.02          | 0.002          | 0.00                | 0.00          | 0.298          | 0.21                 | 0.43          | 0.410   |  |
| <i>MYB39</i> | 1.73            | 0.30          | 0.015          | 1.64                | 0.13          | 0.643          | 0.77                 | 0.11          | 0.005   |  |
| <i>MYB53</i> | 2.11            | 0.42          | 0.006          | 4.10                | 0.43          | 0.001          | 2.91                 | 0.70          | 0.108   |  |
| <i>MYB92</i> | 1.46            | 0.28          | 0.039          | 1.38                | 0.23          | 0.660          | 1.05                 | 0.15          | 0.052   |  |
| <i>MYB93</i> | 2.03            | 0.54          | 0.025          | 2.02                | 0.37          | 0.971          | 4.29                 | 1.49          | 0.049   |  |
| <i>GPAT5</i> | 1.94            | 0.29          | 0.003          | 6.00                | 1.98          | 0.025          | 2.04                 | 0.43          | 0.720   |  |
| <i>FAR4</i>  | 1.34            | 0.19          | 0.033          | 3.30                | 0.47          | 0.002          | 2.34                 | 0.19          | 0.000   |  |

**Supplemental Table 3.** Numerical values of the mRNA levels of the candidate *MYBs* and suberin biosynthetic genes shown in different figures - Fig.2A, Fig.2G, Fig.S2B, Fig.S3C, Fig.4C and Fig.5E

**Fig.4C** Relative expression levels of the suberin biosynthesis and polymerization genes in the roots of *quad-myb* mutant compared to WT (n = 4 pools of 25-30 roots). Results are presented as fold changes compared to the WT.

| Genes         | Renorm AVG | Renorm SD | Renorm AVG | Renorm SD | p-value |
|---------------|------------|-----------|------------|-----------|---------|
| <i>MYB41</i>  | 1.00       | 0.14      | 0.69       | 0.06      | 0.016   |
| <i>MYB39</i>  | 1.00       | 0.16      | 2.89       | 0.14      | 0.000   |
| <i>MYB53</i>  | 1.00       | 0.08      | 0.39       | 0.06      | 0.000   |
| <i>MYB92</i>  | 1.00       | 0.13      | 1.18       | 0.24      | 0.264   |
| <i>MYB93</i>  | 1.00       | 0.04      | 0.48       | 0.11      | 0.001   |
| <i>GPAT5</i>  | 1.00       | 0.22      | 0.41       | 0.12      | 0.006   |
| <i>FAR4</i>   | 1.00       | 0.09      | 0.31       | 0.05      | 0.000   |
| <i>KCS2</i>   | 1.00       | 0.11      | 0.32       | 0.03      | 0.001   |
| <i>LACS2</i>  | 1.00       | 0.14      | 0.38       | 0.06      | 0.001   |
| <i>ABCG6</i>  | 1.00       | 0.14      | 0.42       | 0.06      | 0.002   |
| <i>86B1</i>   | 1.00       | 0.12      | 0.49       | 0.07      | 0.001   |
| <i>FAR5</i>   | 1.00       | 0.10      | 0.37       | 0.03      | 0.000   |
| <i>ABCG20</i> | 1.00       | 0.14      | 1.30       | 0.04      | 0.016   |
| <i>FAR1</i>   | 1.00       | 0.24      | 0.21       | 0.03      | 0.007   |
| <i>ASFT</i>   | 1.00       | 0.15      | 0.92       | 0.07      | 0.394   |
| <i>ABCG2</i>  | 1.00       | 0.19      | 0.68       | 0.08      | 0.035   |
| <i>86A1</i>   | 1.00       | 0.13      | 0.32       | 0.02      | 0.002   |
| <i>FACT</i>   | 1.00       | 0.10      | 0.27       | 0.06      | 0.000   |
| <i>GPAT4</i>  | 1.00       | 0.24      | 0.69       | 0.14      | 0.073   |
| <i>PAL1</i>   | 1.00       | 0.26      | 0.72       | 0.08      | 0.119   |
| <i>PAL2</i>   | 1.00       | 0.19      | 1.91       | 0.38      | 0.010   |
| <i>PAL4</i>   | 1.00       | 0.19      | 1.40       | 0.04      | 0.019   |
| <i>C4H</i>    | 1.00       | 0.22      | 1.19       | 0.13      | 0.211   |
| <i>MYB74</i>  | 1.00       | 0.20      | 1.22       | 0.16      | 0.142   |
| <i>GELP22</i> | 1.00       | 0.55      | 0.70       | 0.47      | 0.129   |
| <i>GELP38</i> | 1.00       | 0.16      | 0.72       | 0.06      | 0.062   |
| <i>GELP49</i> | 1.00       | 0.07      | 0.31       | 0.03      | 0.000   |
| <i>GELP51</i> | 1.00       | 0.07      | 0.73       | 0.09      | 0.070   |
| <i>GELP96</i> | 1.00       | 0.18      | 0.69       | 0.07      | 0.029   |

**Supplemental Table 3.** Numerical values of the mRNA levels of the candidate *MYBs* and suberin biosynthetic genes shown in different figures - Fig.2A, Fig.2G, Fig.S2B, Fig.S3C, Fig.4C and Fig.5E and Fig.5E

**Fig.5E** Relative expression levels of genes encoding nutrient transporters involved in B, Na, Ca, As, and/or Sr acquisition, in the roots of *quad-myb* mutant compared to WT and *CASPIxve::MYB41-mVenus* treated with 5  $\mu$ M Estradiol for 6 h (n = 4 pools of 25-30 roots). Results are presented as fold changes compared to the WT. Numeric values are presented in Table S3. Asterisks indicate statistical significance (P < 0.05).

| Genes                         | WT         |           | <i>quad-myb (myb41-53-92-93)</i> |           |         |
|-------------------------------|------------|-----------|----------------------------------|-----------|---------|
|                               | Renorm AVG | Renorm SD | Renorm AVG                       | Renorm SD | p-value |
| <i>SOS1</i>                   | 1.00       | 0.07      | 0.91                             | 0.13      | 0.28    |
| <i>AKT1</i>                   | 1.00       | 0.09      | 0.91                             | 0.11      | 0.24    |
| <i>BOR1</i>                   | 1.00       | 0.17      | 1.15                             | 0.15      | 0.23    |
| <i>HKT1</i>                   | 1.00       | 0.21      | 1.75                             | 0.72      | 0.12    |
| <i>NIP5;1</i>                 | 1.00       | 0.11      | 1.09                             | 0.42      | 0.71    |
| <i>NHX1</i>                   | 1.00       | 0.13      | 0.96                             | 0.31      | 0.84    |
| <i>NHX2</i>                   | 1.00       | 0.14      | 1.07                             | 0.23      | 0.61    |
| <i>CNGC3</i>                  | 1.00       | 0.15      | 0.98                             | 0.25      | 0.91    |
| <i>CNGC10</i>                 | 1.00       | 0.16      | 1.37                             | 0.38      | 0.14    |
| <i>NIP6;1</i>                 | 1.00       | 0.11      | 1.25                             | 0.50      | 0.40    |
| <i>NIP7;1</i>                 | 1.00       | 0.24      | 1.09                             | 0.57      | 0.78    |
| <i>BOR2</i>                   | 1.00       | 0.13      | 0.63                             | 0.16      | 0.01    |
| <i>CASPIxve::MYB41-mVenus</i> |            |           |                                  |           |         |
| Genes                         | Mock       |           | 6h                               |           |         |
|                               | Renorm AVG | Renorm SD | Renorm AVG                       | Renorm SD | p-value |
| <i>SOS1</i>                   | 1.00       | 0.29      | 0.83                             | 0.15      | 0.37    |
| <i>AKT1</i>                   | 1.00       | 0.29      | 0.92                             | 0.19      | 0.68    |
| <i>BOR1</i>                   | 1.00       | 0.27      | 1.01                             | 0.18      | 0.95    |
| <i>HKT1</i>                   | 1.00       | 0.42      | 1.11                             | 0.09      | 0.64    |
| <i>NIP5;1</i>                 | 1.00       | 0.17      | 1.06                             | 0.10      | 0.55    |
| <i>NHX1</i>                   | 1.00       | 0.16      | 0.96                             | 0.12      | 0.71    |
| <i>NHX2</i>                   | 1.00       | 0.24      | 1.14                             | 0.15      | 0.36    |
| <i>CNGC3</i>                  | 1.00       | 0.24      | 0.96                             | 0.09      | 0.77    |
| <i>CNGC10</i>                 | 1.00       | 0.24      | 0.98                             | 0.16      | 0.87    |
| <i>NIP6;1</i>                 | 1.00       | 0.33      | 0.81                             | 0.14      | 0.34    |
| <i>NIP7;1</i>                 | 1.00       | 0.19      | 1.13                             | 0.09      | 0.30    |
| <i>BOR2</i>                   | 1.00       | 0.26      | 1.08                             | 0.40      | 0.74    |

**Supplemental Table 4.** Numerical values of raw data from different ionic experiments and normalized ionic data shown in Fig.4D and Fig.S5C. Ionic profiling of leaves of WT, *ELTP::CDEF1*, *quad-myb*, *ELTP::MYB41* and *CASPI::MYB41* plants. Elements were determined by ICP-MS. Results are presented as average fold changes compared to the WT.

| Ionic analysis 1 |               |                    |                       |                       |          |                    |                       |                       |
|------------------|---------------|--------------------|-----------------------|-----------------------|----------|--------------------|-----------------------|-----------------------|
| Elements         | Average (ppm) |                    |                       |                       | Stdev    |                    |                       |                       |
|                  | WT            | <i>ELTP::CDEF1</i> | <i>CASPI::MYB41#1</i> | <i>CASPI::MYB41#2</i> | WT       | <i>ELTP::CDEF1</i> | <i>CASPI::MYB41#1</i> | <i>CASPI::MYB41#2</i> |
| Li 7             | 0.021         | 0.030              | 0.022                 | 0.023                 | 0.001    | 0.001              | 0.005                 | 0.003                 |
| B 11             | 26.898        | 28.687             | 25.072                | 23.620                | 1.356    | 0.749              | 1.027                 | 1.008                 |
| Na 23            | 488.000       | 696.844            | 442.591               | 409.046               | 72.174   | 84.094             | 15.691                | 38.588                |
| Mg 24            | 2865.608      | 3153.589           | 2702.741              | 2695.868              | 145.932  | 90.983             | 75.959                | 151.522               |
| P 31             | 19603.33      | 17285.48           | 18479.16              | 18029.81              | 1987.664 | 1155.865           | 1217.271              | 1152.952              |
| S 34             | 12808.08      | 12345.30           | 12499.97              | 12658.80              | 992.690  | 662.792            | 791.323               | 419.699               |
| K 39             | 78914.07      | 57580.30           | 71298.14              | 64986.02              | 7700.874 | 6400.459           | 4755.106              | 2400.489              |
| Ca 43            | 6322.936      | 8428.005           | 5923.168              | 4619.001              | 508.691  | 342.674            | 175.522               | 497.570               |
| Mn 55            | 0.135         | 0.484              | 208.784               | 0.131                 | 0.041    | 0.698              | 2.254                 | 0.054                 |
| Fe 56            | 208.043       | 265.099            | 148.748               | 200.105               | 8.307    | 8.921              | 6.303                 | 15.953                |
| Co 59            | 153.613       | 134.607            | 0.223                 | 130.906               | 6.130    | 8.212              | 0.018                 | 6.646                 |
| Ni 60            | 0.169         | 0.177              | 0.678                 | 0.237                 | 0.013    | 0.009              | 0.304                 | 0.022                 |
| Cu 63            | 0.468         | 0.919              | 4.009                 | 1.171                 | 0.037    | 0.273              | 0.666                 | 0.010                 |
| Zn 66            | 3.616         | 3.541              | 562.223               | 3.434                 | 0.293    | 0.411              | 22.407                | 0.082                 |
| As 75            | 424.885       | 372.926            | 3.447                 | 613.655               | 14.499   | 9.145              | 0.580                 | 69.854                |
| Rb 85            | 64.905        | 48.444             | 57.893                | 52.685                | 7.429    | 5.716              | 3.612                 | 1.181                 |
| Sr 88            | 11.241        | 14.220             | 10.680                | 9.185                 | 0.591    | 0.372              | 0.157                 | 0.585                 |
| Mo 98            | 4.135         | 4.298              | 4.051                 | 4.562                 | 0.173    | 0.046              | 0.213                 | 0.150                 |
| Cd 111           | 0.833         | 0.422              | 0.454                 | 0.506                 | 0.233    | 0.061              | 0.033                 | 0.085                 |



**Supplemental Table 4.** Numerical values of raw data from different ionic experiments and normalized ionic data shown in Fig.4D and Fig.S5C. Ionic profiling of leaves of WT, *ELTP::CDEF1*, *quad-myb*, *ELTP::MYB41* and *CASPI::MYB41* plants. Elements were determined by ICP-MS. Results are presented as average fold changes compared to the WT.

| Ionic analysis 2 |               |                    |                       |                       |                      |                      |
|------------------|---------------|--------------------|-----------------------|-----------------------|----------------------|----------------------|
| Elements         | Average (ppm) |                    |                       |                       |                      |                      |
|                  | WT            | <i>ELTP::CDEF1</i> | <i>CASPI::MYB41#1</i> | <i>CASPI::MYB41#2</i> | <i>ELTP::MYB41#1</i> | <i>ELTP::MYB41#2</i> |
| Li 7             | 0.0           | 0.0                | 0.0                   | 0.0                   | 0.0                  | 0.0                  |
| B 11             | 31.2          | 36.0               | 32.0                  | 32.6                  | 29.2                 | 32.4                 |
| Na 23            | 396.3         | 770.3              | 437.2                 | 420.6                 | 398.5                | 459.6                |
| Mg 24            | 2278.9        | 2733.0             | 2212.6                | 2217.6                | 2130.8               | 2232.9               |
| P 31             | 14536.6       | 13244.9            | 13458.8               | 12202.7               | 12117.7              | 12315.2              |
| S 34             | 10276.7       | 11334.5            | 10466.2               | 10404.7               | 10067.8              | 10329.1              |
| K 39             | 57460.1       | 49601.3            | 54124.3               | 47288.8               | 50327.6              | 49695.4              |
| Ca 43            | 5120.8        | 7509.6             | 4813.8                | 4437.5                | 4392.4               | 4464.6               |
| Mn 55            | 193.9         | 277.8              | 223.0                 | 224.5                 | 213.8                | 222.6                |
| Fe 56            | 182.0         | 163.1              | 164.3                 | 136.0                 | 143.6                | 131.0                |
| Co 59            | 0.2           | 0.2                | 0.3                   | 0.2                   | 0.3                  | 0.2                  |
| Ni 60            | 0.5           | 0.5                | 0.4                   | 0.5                   | 0.6                  | 0.4                  |
| Cu 63            | 2.9           | 3.4                | 2.8                   | 3.0                   | 2.8                  | 3.1                  |
| Zn 66            | 420.7         | 331.5              | 507.3                 | 498.5                 | 433.6                | 478.6                |
| As 75            | 0.1           | 0.2                | 0.1                   | 0.2                   | 0.2                  | 0.2                  |
| Rb 85            | 57.1          | 51.4               | 54.9                  | 48.6                  | 51.4                 | 50.3                 |
| Sr 88            | 9.8           | 16.6               | 10.5                  | 9.5                   | 9.2                  | 10.2                 |
| Mo 98            | 3.9           | 5.3                | 4.7                   | 4.8                   | 5.0                  | 5.3                  |
| Cd 111           | 0.3           | 0.2                | 0.3                   | 0.3                   | 0.3                  | 0.3                  |
| Elements         | Stdev         |                    |                       |                       |                      |                      |
|                  | WT            | <i>ELTP::CDEF1</i> | <i>CASPI::MYB41#1</i> | <i>CASPI::MYB41#2</i> | <i>ELTP::MYB41#1</i> | <i>ELTP::MYB41#2</i> |
| Li 7             | 0.0           | 0.0                | 0.0                   | 0.0                   | 0.0                  | 0.0                  |
| B 11             | 1.6           | 1.2                | 1.5                   | 0.3                   | 1.4                  | 2.1                  |
| Na 23            | 48.9          | 151.1              | 53.8                  | 15.8                  | 23.9                 | 36.4                 |
| Mg 24            | 134.6         | 68.6               | 65.9                  | 23.5                  | 50.2                 | 24.1                 |
| P 31             | 547.0         | 463.2              | 538.4                 | 547.1                 | 542.1                | 677.7                |
| S 34             | 286.9         | 416.3              | 418.7                 | 393.7                 | 291.0                | 88.2                 |
| K 39             | 3142.2        | 1424.7             | 2020.7                | 3051.1                | 717.0                | 3007.8               |
| Ca 43            | 508.2         | 630.0              | 297.7                 | 371.5                 | 265.2                | 39.5                 |
| Mn 55            | 13.6          | 22.4               | 8.0                   | 10.0                  | 13.1                 | 6.8                  |
| Fe 56            | 4.6           | 13.5               | 10.7                  | 12.1                  | 7.1                  | 2.7                  |
| Co 59            | 0.0           | 0.0                | 0.0                   | 0.0                   | 0.0                  | 0.0                  |
| Ni 60            | 0.1           | 0.1                | 0.0                   | 0.1                   | 0.1                  | 0.0                  |
| Cu 63            | 0.1           | 0.1                | 0.1                   | 0.2                   | 0.1                  | 0.1                  |
| Zn 66            | 46.2          | 19.3               | 9.1                   | 30.8                  | 33.1                 | 32.8                 |
| As 75            | 0.0           | 0.0                | 0.0                   | 0.0                   | 0.0                  | 0.0                  |
| Rb 85            | 3.9           | 1.4                | 2.7                   | 3.7                   | 1.5                  | 2.4                  |
| Sr 88            | 0.6           | 1.8                | 0.5                   | 0.4                   | 0.3                  | 0.0                  |
| Mo 98            | 0.2           | 0.2                | 0.3                   | 0.3                   | 0.3                  | 0.2                  |
| Cd 111           | 0.0           | 0.1                | 0.0                   | 0.0                   | 0.1                  | 0.0                  |

**Supplemental Table 4.** Numerical values of raw data from different ionic experiments and normalized ionic data shown in Fig.4D and Fig.S5C. Ionic profiling of leaves of WT, *ELTP::CDEF1*, *quad-myb*, *ELTP::MYB41* and *CASP1::MYB41* plants. Elements were determined by ICP-MS. Results are presented as average fold changes compared to the WT.

| Ionic analysis 3 |               |                 |       |                 |
|------------------|---------------|-----------------|-------|-----------------|
| Elements         | Average (ppm) |                 | Stdev |                 |
|                  | WT            | <i>quad-myb</i> | WT    | <i>quad-myb</i> |
| Li 7             | 0.0           | 0.0             | 0.0   | 0.0             |
| B 11             | 15.9          | 16.1            | 0.1   | 1.6             |
| Na 23            | 804.7         | 871.5           | 39.3  | 12.0            |
| Mg 24            | 2436.0        | 2310.4          | 30.8  | 43.8            |
| P 31             | 12907.6       | 12215.5         | 214.4 | 283.9           |
| S 34             | 10657.4       | 10351.8         | 386.0 | 217.6           |
| K 39             | 55819.6       | 55928.3         | 796.3 | 1614.8          |
| Ca 43            | 4636.0        | 4600.5          | 88.3  | 171.0           |
| Mn 55            | 168.3         | 161.6           | 6.1   | 4.6             |
| Fe 56            | 187.9         | 173.4           | 17.4  | 6.9             |
| Co 59            | 0.2           | 0.1             | 0.0   | 0.0             |
| Ni 60            | 1.3           | 1.0             | 0.3   | 0.1             |
| Cu 63            | 4.4           | 4.0             | 0.1   | 0.3             |
| Zn 66            | 305.2         | 339.8           | 7.9   | 26.6            |
| As 75            | 0.1           | 0.2             | 0.0   | 0.0             |
| Rb 85            | 60.7          | 61.4            | 0.6   | 1.5             |
| Sr 88            | 8.9           | 8.7             | 0.1   | 0.4             |
| Mo 98            | 6.4           | 5.8             | 0.3   | 0.2             |
| Cd 111           | 0.4           | 0.4             | 0.0   | 0.0             |

**Supplemental Table 4.** Numerical values of raw data from different ionic experiments and normalized ionic data shown in Fig.4D and Fig.S5C. Ionic profiling of leaves of WT, *ELTP::CDEF1*, *quad-myb*, *ELTP::MYB41* and *CASP1::MYB41* plants. Elements were determined by ICP-MS. Results are presented as average fold changes compared to the WT.

| Elements | Ionic analysis 4 |                 |                      |       |                 |                      |
|----------|------------------|-----------------|----------------------|-------|-----------------|----------------------|
|          | Average (ppm)    |                 |                      | Stdev |                 |                      |
|          | WT               | <i>quad-myb</i> | <i>ELTP::MYB41#1</i> | WT    | <i>quad-myb</i> | <i>ELTP::MYB41#1</i> |
| Li 7     | 0.0              | 0.0             | 0.0                  | 0.0   | 0.0             | 0.0                  |
| B 11     | 20.8             | 22.4            | 15.9                 | 0.4   | 0.6             | 3.7                  |
| Na 23    | 1304.9           | 1495.1          | 284.1                | 22.0  | 108.5           | 15.7                 |
| Mg 24    | 2101.5           | 2160.1          | 1943.8               | 29.5  | 28.6            | 398.4                |
| P 31     | 12488.9          | 11925.3         | 11322.2              | 308.1 | 163.5           | 3116.7               |
| S 34     | 9307.9           | 9121.9          | 8643.3               | 206.6 | 279.4           | 2326.2               |
| K 39     | 57855.0          | 59140.9         | 49542.1              | 482.9 | 1193.7          | 11305.2              |
| Ca 43    | 3736.9           | 4036.4          | 3129.3               | 22.2  | 123.8           | 633.0                |
| Mn 55    | 139.3            | 148.0           | 129.9                | 1.2   | 6.1             | 26.2                 |
| Fe 56    | 227.2            | 239.4           | 167.1                | 12.5  | 4.4             | 36.9                 |
| Co 59    | 0.1              | 0.1             | 0.2                  | 0.0   | 0.0             | 0.0                  |
| Ni 60    | 0.6              | 0.6             | 0.9                  | 0.0   | 0.1             | 0.2                  |
| Cu 63    | 3.9              | 4.3             | 4.1                  | 0.5   | 0.2             | 1.1                  |
| Zn 66    | 305.2            | 355.7           | 222.0                | 23.1  | 21.3            | 60.2                 |
| As 75    | 0.1              | 0.1             | 0.1                  | 0.0   | 0.0             | 0.0                  |
| Rb 85    | 61.5             | 64.2            | 52.1                 | 0.6   | 1.8             | 11.2                 |
| Sr 88    | 7.3              | 7.8             | 6.1                  | 0.1   | 0.2             | 1.2                  |
| Mo 98    | 4.3              | 4.2             | 4.1                  | 0.3   | 0.4             | 0.7                  |
| Cd 111   | 0.3              | 0.3             | 0.3                  | 0.0   | 0.0             | 0.1                  |

**Supplemental Table 4.** Numerical values of raw data from different ionic experiments and normalized ionic data shown in Fig.4D and Fig.S5C. Ionic profiling of leaves of WT, *ELTP::CDEF1*, *quad-myb*, *ELTP::MYB41* and *CASP1::MYB41* plants. Elements were determined by ICP-MS. Results are presented as average fold changes compared to the WT.

| Normalized data (%) shown in Fig.4D |      |                    |                 |                       |                       |
|-------------------------------------|------|--------------------|-----------------|-----------------------|-----------------------|
| Elements                            | WT   | <i>ELTP::CDEF1</i> | <i>quad-myb</i> | <i>ELTP::MYB41 #1</i> | <i>CASP1::MYB41#2</i> |
| Li 7                                | 0.00 | 60.85              | 7.86            | 12.47                 | 21.01                 |
| B 11                                | 0.00 | 13.82              | 4.09            | -15.07                | -3.94                 |
| Na 23                               | 0.00 | 69.21              | 11.43           | -38.84                | -5.03                 |
| Mg 24                               | 0.00 | 8.87               | -1.18           | -7.00                 | -4.31                 |
| P 31                                | 0.00 | -9.65              | -4.94           | -12.99                | -12.04                |
| S 34                                | 0.00 | 0.80               | -2.43           | -4.59                 | 0.04                  |
| K 39                                | 0.00 | -18.14             | 1.21            | -13.39                | -17.68                |
| Ca 43                               | 0.00 | 29.06              | 3.62            | -15.24                | -20.15                |
| Mn 55                               | 0.00 | 27.31              | 9.93            | -0.67                 | 6.00                  |
| Fe 56                               | 0.00 | -3.23              | 1.12            | -13.92                | -20.03                |
| Co 59                               | 0.00 | 1.98               | -1.18           | -7.39                 | 21.39                 |
| Ni 60                               | 0.00 | -9.51              | -5.66           | 36.91                 | -1.67                 |
| Cu 63                               | 0.00 | 5.27               | -10.56          | 16.97                 | -0.82                 |
| Zn 66                               | 0.00 | -7.49              | 2.27            | 4.79                  | 31.46                 |
| As 75                               | 0.00 | 6.49               | 13.95           | -12.73                | -1.52                 |
| Rb 85                               | 0.00 | -30.54             | 2.78            | -12.66                | -16.90                |
| Sr 88                               | 0.00 | 31.64              | 1.85            | -11.04                | -10.88                |
| Mo 98                               | 0.00 | 7.83               | -6.59           | 10.47                 | 15.80                 |
| Cd 111                              | 0.00 | -31.14             | -1.88           | 10.28                 | -18.19                |

## SI References:

1. Robe K, *et al.* (2021) Coumarin accumulation and trafficking in *Arabidopsis thaliana*: a complex and dynamic process. *The New phytologist* 229(4):2062-2079.
2. Karimi M, Bleys A, Vanderhaeghen R, & Hilson P (2007) Building blocks for plant gene assembly. *Plant Physiol* 145(4):1183-1191.
3. Shimada TL, Shimada T, & Hara-Nishimura I (2010) A rapid and non-destructive screenable marker, FAST, for identifying transformed seeds of *Arabidopsis thaliana*. *Plant J* 61(3):519-528.
4. Roppolo D, *et al.* (2011) A novel protein family mediates Casparian strip formation in the endodermis. *Nature* 473(7347):380-383.
5. Wyrsh I, Domínguez-Ferreras A, Geldner N, & Boller T (2015) Tissue-specific FLAGELLIN-SENSING 2 (FLS2) expression in roots restores immune responses in *Arabidopsis fls2* mutants. *New Phytologist* 206(2):774-784.
6. Kosma DK, *et al.* (2014) AtMYB41 activates ectopic suberin synthesis and assembly in multiple plant species and cell types. *The Plant Journal* 80(2):216-229.
7. Lee Y, Rubio MC, Alassimone J, & Geldner N (2013) A Mechanism for Localized Lignin Deposition in the Endodermis. *Cell* 153(2):402-412.
8. Fauser F, Schiml S, & Puchta H (2014) Both CRISPR/Cas-based nucleases and nickases can be used efficiently for genome engineering in *Arabidopsis thaliana*. *The Plant Journal* 79(2):348-359.
9. Ursache R, *et al.* (2021) GDSL-domain proteins have key roles in suberin polymerization and degradation. *Nature Plants* 7(3):353-364.
10. Ursache R, Fujita S, Tendon VD, & Geldner N (2021) Combined fluorescent seed selection and multiplex CRISPR/Cas9 assembly for fast generation of multiple *Arabidopsis* mutants. *bioRxiv*:2021.2005.2020.444986.
11. Liu H, *et al.* (2017) CRISPR-P 2.0: An Improved CRISPR-Cas9 Tool for Genome Editing in Plants. *Molecular Plant* 10(3):530-532.
12. Clough SJ & Bent AF (1998) Floral dip: a simplified method for *Agrobacterium*-mediated transformation of *Arabidopsis thaliana*. *The Plant Journal* 16(6):735-743.
13. Schindelin J, *et al.* (2012) Fiji: an open-source platform for biological-image analysis. *Nature Methods* 9(7):676-682.
14. Barberon M, *et al.* (2016) Adaptation of Root Function by Nutrient-Induced Plasticity of Endodermal Differentiation. *Cell* 164(3):447-459.

15. Pfister A, *et al.* (2014) A receptor-like kinase mutant with absent endodermal diffusion barrier displays selective nutrient homeostasis defects. *Elife* 3.
16. Ursache R, Andersen TG, Marhavý P, & Geldner N (2018) A protocol for combining fluorescent proteins with histological stains for diverse cell wall components. *Plant J* 93(2):399-412.
17. Naseer S, *et al.* (2012) Casparian strip diffusion barrier in Arabidopsis is made of a lignin polymer without suberin. *Proceedings of the National Academy of Sciences* 109(25):10101-10106.
18. Li-Beisson Y, *et al.* (2013) Acyl-Lipid Metabolism. *The Arabidopsis Book* 2013(11).
19. Goda H, *et al.* (2008) The AtGenExpress hormone and chemical treatment data set: experimental design, data evaluation, model data analysis and data access. *The Plant Journal* 55(3):526-542.
20. Fujita S, *et al.* (2020) SCHENGEN receptor module drives localized ROS production and lignification in plant roots. *The EMBO journal* 39(9):e103894.
